# Supplementary material for: Causal Association Between Anemia and Cardiovascular Disease: A 2‐Sample Bidirectional Mendelian Randomization Study
Source: PubMed Central journal article supplement — J Am Heart Assoc. 2023 Jun 10;12(12):e029689. doi: 10.1161/JAHA.123.029689 (PMC10356041; doi:10.1161/jaha.123.029689), 2023-06-10
Supplement: JAH3-12-e029689-s001.pdf [file JAH3-12-e029689-s001.pdf]

# Supplementary material

**Table S1** F statistics for the causal effect of anemia on CVD in MR analysis

| Diseases                | Data sources      | Sample size<br>(cases/controls) | Ancestry | R <sup>2</sup> (%) for<br>anemia (Total) | F for anemia<br>(Total) |
|-------------------------|-------------------|---------------------------------|----------|------------------------------------------|-------------------------|
| Heart failure           | HERMES            | 47,309/930,014                  | European | 3.5                                      | 279.8                   |
| Coronary artery disease | CARDIoGRAMplusC4D | 60,801/123,504                  | Mixed    | 3.5                                      | 280.3                   |
| Atrial fibrillation     | AFGen             | 65,446/522,744                  | European | 3.7                                      | 273.4                   |
| Any stroke              | MEGASTROKE        | 40,585/406,111                  | European | 3.7                                      | 254.5                   |
| Any ischemic stroke     | MEGASTROKE        | 34,217/406,111                  | European | 3.7                                      | 254.5                   |

FinnGen: the FinnGen Consortium; HERMES; Heart Failure Molecular Epidemiology for Therapeutic Targets; CARDIoGRAMplusC4D, Coronary Artery Disease Genome-wide Replication and Meta-analysis plus The Coronary Artery Disease Genetics; AFGen, Atrial Fibrillation Genetics; MEGASTROKE, the MEGASTROKE Consortium.

Note: R<sup>2</sup>: Variability explained by genetic instruments. The R<sup>2</sup> was calculated using the formula:  $R^2 = \beta^2(1 - EAF) * 2EAF$ .  $\beta$  is the association coefficient between the SNP and phenotype, and EAF is the minor allele frequency.

Furthermore, the F statistics were calculated using the formula:  $F = R^2(N - K - 1) / [K(1 - R^2)]$ . R<sup>2</sup> is the proportion of the variability of anemia explained by each instrument, K is the number of SNP-anemia association, N is the sample size of the GWAS for the SNP-anemia association.

**Table S2** Pleiotropic associations with used SNPs for anemia in FinnGen study

| SNP       | Effect_allele | Other_allele | Traits                                                            | Direction |
|-----------|---------------|--------------|-------------------------------------------------------------------|-----------|
| rs2476601 | A             | G            | Basophil percentage of granulocytes                               | +         |
|           | A             | G            | Basophil percentage of white cells                                | +         |
|           | A             | G            | Granulocyte count                                                 | -         |
|           | A             | G            | Lymphocyte count                                                  | -         |
|           | A             | G            | Myeloid white cell count                                          | -         |
|           | A             | G            | Neutrophil count                                                  | -         |
|           | A             | G            | Sum basophil neutrophil counts                                    | -         |
|           | A             | G            | Sum neutrophil eosinophil counts                                  | -         |
|           | A             | G            | White blood cell count                                            | -         |
|           | A             | G            | Amoxicillin clavulanate drug induced liver injury                 | NA        |
|           | A             | G            | Crohn disease                                                     | NA        |
|           | A             | G            | Drug induced liver injury                                         | NA        |
|           | A             | G            | Drug induced liver injury all cholestatic DILI cases              | NA        |
|           | A             | G            | Generalized vitiligo                                              | NA        |
|           | A             | G            | Generalized vitiligo with concomitant other autoimmune disorder   | NA        |
|           | A             | G            | Graves disease                                                    | NA        |
|           | A             | G            | Graves disease and Hashimotos thyroiditis                         | NA        |
|           | A             | G            | Hashimotos thyroiditis                                            | NA        |
|           | A             | G            | Hypothyroidism                                                    | NA        |
|           | A             | G            | Myasthenia gravis                                                 | NA        |
|           | A             | G            | Myasthenia gravis among females                                   | NA        |
|           | A             | G            | Rheumatoid arthritis                                              | NA        |
|           | A             | G            | Rheumatoid arthritis                                              | NA        |
|           | A             | G            | Rheumatoid arthritis                                              | NA        |
|           | A             | G            | Rheumatoid arthritis ACPA positive                                | NA        |
|           | A             | G            | Rheumatoid arthritis cyclic citrullinated peptide CCP positive    | NA        |
|           | A             | G            | Selective immunoglobulin A deficiency IgAD                        | NA        |
|           | A             | G            | Systemic lupus erythematosus SLE females                          | NA        |
|           | A             | G            | Type 1 diabetes                                                   | NA        |
|           | A             | G            | Crohns disease                                                    | -         |
|           | A             | G            | Crohns disease                                                    | NA        |
|           | A             | G            | Late onset myasthenia gravis                                      | NA        |
|           | A             | G            | Systemic lupus erythematosus                                      | +         |
|           | A             | G            | Systemic lupus erythematosus or rheumatoid arthritis              | NA        |
|           | A             | G            | Type 1 diabetes and autoimmune thyroid diseases                   | +         |
|           | A             | G            | Diabetes diagnosed by doctor                                      | +         |
|           | A             | G            | Insulin-dependent diabetes mellitus                               | +         |
|           | A             | G            | Long-standing illness, disability or infirmity                    | +         |
|           | A             | G            | Medication for cholesterol, blood pressure or diabetes: insulin   | +         |
|           | A             | G            | Number of self-reported non-cancer illnesses                      | +         |
|           | A             | G            | Number of treatments or medications taken                         | +         |
|           | A             | G            | Other rheumatoid arthritis                                        | +         |
|           | A             | G            | Other serious medical condition or disability diagnosed by doctor | +         |
|           | A             | G            | Self-reported diabetes                                            | +         |
|           | A             | G            | Self-reported hyperthyroidism or thyrotoxicosis                   | +         |
|           | A             | G            | Self-reported hypothyroidism or myxoedema                         | +         |

|          |   |   |                                                                                               |    |
|----------|---|---|-----------------------------------------------------------------------------------------------|----|
|          | A | G | Self-reported pernicious anemia                                                               | +  |
|          | A | G | Self-reported rheumatoid arthritis                                                            | +  |
|          | A | G | Self-reported type 1 diabetes                                                                 | +  |
|          | A | G | Started insulin within one year diagnosis of diabetes                                         | +  |
|          | A | G | Taking other prescription medications                                                         | +  |
|          | A | G | Treatment with folic acid product                                                             | +  |
|          | A | G | Treatment with insulin                                                                        | +  |
|          | A | G | Treatment with insulin product                                                                | +  |
|          | A | G | Treatment with levothyroxine sodium                                                           | +  |
|          | A | G | Treatment with methotrexate                                                                   | +  |
|          | A | G | Treatment with thyroxine product                                                              | +  |
|          | A | G | Treatment with thyroxine sodium                                                               | +  |
|          | A | G | Rheumatoid arthritis                                                                          | +  |
|          | A | G | Rheumatoid arthritis                                                                          | +  |
|          | A | G | Arthritis rheumatoid                                                                          | NA |
|          | A | G | Arthritis rheumatoid                                                                          | NA |
|          | A | G | Arthritis rheumatoid                                                                          | NA |
|          | A | G | Crohn disease                                                                                 | NA |
|          | A | G | Diabetes mellitus type 1                                                                      | NA |
|          | A | G | Vitiligo                                                                                      | NA |
|          | A | G | Coronary artery disease                                                                       | +  |
| rs707926 | A | G | Eosinophil count                                                                              | +  |
|          | A | G | Eosinophil percentage of granulocytes                                                         | +  |
|          | A | G | Eosinophil percentage of white cells                                                          | +  |
|          | A | G | High light scatter percentage of red cells                                                    | +  |
|          | A | G | High light scatter reticulocyte count                                                         | +  |
|          | A | G | Immature fraction of reticulocytes                                                            | +  |
|          | A | G | Mean platelet volume                                                                          | -  |
|          | A | G | Neutrophil percentage of granulocytes                                                         | -  |
|          | A | G | Reticulocyte count                                                                            | +  |
|          | A | G | Reticulocyte fraction of red cells                                                            | +  |
|          | A | G | Sum eosinophil basophil counts                                                                | +  |
|          | A | G | Age-related macular degeneration                                                              | -  |
|          | A | G | Age-related macular degeneration                                                              | -  |
|          | A | G | Advanced age related macular degeneration                                                     | NA |
|          | A | G | Primary sclerosing cholangitis                                                                | -  |
|          | A | G | Asthma                                                                                        | -  |
|          | A | G | Hearing difficulty or problems with background noise                                          | +  |
|          | A | G | Intestinal malabsorption                                                                      | -  |
|          | A | G | Mouth or teeth dental problems: mouth ulcers                                                  | +  |
|          | A | G | No blood clot, bronchitis, emphysema, asthma, rhinitis, eczema or allergy diagnosed by doctor | +  |
|          | A | G | Past tobacco smoking                                                                          | -  |
|          | A | G | Peak expiratory flow                                                                          | +  |
|          | A | G | Self-reported ankylosing spondylitis                                                          | +  |
|          | A | G | Self-reported asthma                                                                          | -  |
|          | A | G | Self-reported malabsorption or coeliac disease                                                | -  |
|          | A | G | Started insulin within one year diagnosis of diabetes                                         | +  |
|          | A | G | Systolic blood pressure                                                                       | -  |

|           |   |   |                                                                                               |   |
|-----------|---|---|-----------------------------------------------------------------------------------------------|---|
|           | A | G | Time spent using computer                                                                     | + |
|           | A | G | Treatment with insulin product                                                                | + |
|           | A | G | Age at menopause                                                                              | - |
| rs3129761 | C | G | Body mass index males                                                                         | - |
|           | C | G | Body mass index                                                                               | - |
|           | C | G | Hematocrit                                                                                    | - |
|           | C | G | Hemoglobin concentration                                                                      | - |
|           | C | G | High light scatter percentage of red cells                                                    | - |
|           | C | G | High light scatter reticulocyte count                                                         | - |
|           | C | G | Lymphocyte count                                                                              | - |
|           | C | G | Mean corpuscular hemoglobin concentration                                                     | - |
|           | C | G | Monocyte count                                                                                | - |
|           | C | G | Red blood cell count                                                                          | - |
|           | C | G | Reticulocyte count                                                                            | - |
|           | C | G | Reticulocyte fraction of red cells                                                            | - |
|           | C | G | Crohns disease                                                                                | - |
|           | C | G | Inflammatory bowel disease                                                                    | - |
|           | C | G | Ulcerative colitis                                                                            | - |
|           | C | G | Asthma                                                                                        | + |
|           | C | G | Asthma                                                                                        | + |
|           | C | G | Diabetes diagnosed by doctor                                                                  | + |
|           | C | G | Doctor diagnosed asthma                                                                       | + |
|           | C | G | Eye problems or disorders: diabetes related eye disease                                       | + |
|           | C | G | Forced expiratory volume in 1-second                                                          | - |
|           | C | G | Forced expiratory volume in 1-second, best measure                                            | - |
|           | C | G | Forced expiratory volume in 1-second, predicted percentage                                    | - |
|           | C | G | Forced vital capacity                                                                         | - |
|           | C | G | Forced vital capacity, best measure                                                           | - |
|           | C | G | Illnesses of father: lung cancer                                                              | + |
|           | C | G | Illnesses of siblings: diabetes                                                               | + |
|           | C | G | Insulin-dependent diabetes mellitus                                                           | + |
|           | C | G | Intestinal malabsorption                                                                      | + |
|           | C | G | Long-standing illness, disability or infirmity                                                | + |
|           | C | G | Medication for cholesterol, blood pressure or diabetes: insulin                               | + |
|           | C | G | Nasal polyp                                                                                   | + |
|           | C | G | No blood clot, bronchitis, emphysema, asthma, rhinitis, eczema or allergy diagnosed by doctor | - |
|           | C | G | Number of self-reported non-cancer illnesses                                                  | + |
|           | C | G | Number of treatments or medications taken                                                     | + |
|           | C | G | Other disorders of pancreatic internal secretion                                              | + |
|           | C | G | Other rheumatoid arthritis                                                                    | + |
|           | C | G | Other serious medical condition or disability diagnosed by doctor                             | + |
|           | C | G | Overall health rating                                                                         | + |
|           | C | G | Self-reported adrenocortical insufficiency or addisons disease                                | + |
|           | C | G | Self-reported asthma                                                                          | + |
|           | C | G | Self-reported diabetes                                                                        | + |
|           | C | G | Self-reported diabetic eye disease                                                            | + |
|           | C | G | Self-reported hyperthyroidism or thyrotoxicosis                                               | + |
|           | C | G | Self-reported hypothyroidism or myxoedema                                                     | + |

|           |   |                                                       |   |
|-----------|---|-------------------------------------------------------|---|
| C         | G | Self-reported malabsorption or coeliac disease        | + |
| C         | G | Self-reported multiple sclerosis                      | - |
| C         | G | Self-reported nasal polyps                            | + |
| C         | G | Self-reported polymyalgia rheumatica                  | + |
| C         | G | Self-reported psoriasis                               | - |
| C         | G | Self-reported rheumatoid arthritis                    | + |
| C         | G | Self-reported sjogrens syndrome or sicca syndrome     | + |
| C         | G | Self-reported type 1 diabetes                         | + |
| C         | G | Self-reported ulcerative colitis                      | - |
| C         | G | Started insulin within one year diagnosis of diabetes | + |
| C         | G | Taking other prescription medications                 | + |
| C         | G | Thyrotoxicosis                                        | + |
| C         | G | Treatment with becotide 50 inhaler                    | + |
| C         | G | Treatment with fludrocortisone                        | + |
| C         | G | Treatment with folic acid product                     | + |
| C         | G | Treatment with hydroxychloroquine                     | + |
| C         | G | Treatment with insulin                                | + |
| C         | G | Treatment with insulin product                        | + |
| C         | G | Treatment with levothyroxine sodium                   | + |
| C         | G | Treatment with methotrexate                           | + |
| C         | G | Treatment with montelukast product                    | + |
| C         | G | Treatment with plaquenil 200mg tablet                 | + |
| C         | G | Treatment with prednisolone                           | + |
| C         | G | Treatment with salbutamol                             | + |
| C         | G | Treatment with seretide 50 evohaler                   | + |
| C         | G | Treatment with sulfasalazine                          | + |
| C         | G | Treatment with symbicort 100 or 6 turbohaler          | + |
| C         | G | Treatment with thyroxine product                      | + |
| C         | G | Treatment with thyroxine sodium                       | + |
| C         | G | Treatment with ventolin 100micrograms inhaler         | + |
| C         | G | Ulcerative colitis                                    | - |
| C         | G | Vitamin and mineral supplements: folic acid or folate | + |
| C         | G | Wheeze or whistling in the chest in last year         | + |
| C         | G | Rheumatoid arthritis                                  | + |
| rs7184768 | A | Arm fat-free mass left                                | + |
|           | A | Arm fat-free mass right                               | + |
|           | A | Arm predicted mass left                               | + |
|           | A | Arm predicted mass right                              | + |
|           | A | Basal metabolic rate                                  | + |
|           | A | Height                                                | + |
|           | A | Leg fat-free mass left                                | + |
|           | A | Leg fat-free mass right                               | + |
|           | A | Leg predicted mass left                               | + |
|           | A | Leg predicted mass right                              | + |
|           | A | Sitting height                                        | + |
|           | A | Trunk fat-free mass                                   | + |
|           | A | Trunk predicted mass                                  | + |
|           | A | Weight                                                | + |
|           | A | Whole body fat-free mass                              | + |

**Table S3** Information on instrumental variables for anemia in FinnGen study

| SNP         | Chr | Position  | A1 | A2 | EAF   | Beta   | SE    | P-val    |
|-------------|-----|-----------|----|----|-------|--------|-------|----------|
| rs149614393 | 1   | 112820064 | C  | A  | 0.124 | 0.099  | 0.020 | 1.09E-06 |
| rs12615303  | 2   | 26917705  | C  | T  | 0.336 | -0.072 | 0.014 | 4.21E-07 |
| rs6728914   | 2   | 184421981 | T  | G  | 0.007 | 0.388  | 0.081 | 1.86E-06 |
| rs2169706   | 4   | 19271294  | T  | C  | 0.312 | 0.070  | 0.014 | 1.12E-06 |
| rs35172598  | 6   | 103952813 | T  | C  | 0.113 | -0.116 | 0.022 | 8.50E-08 |
| rs847720    | 7   | 71116080  | T  | C  | 0.727 | 0.069  | 0.015 | 4.32E-06 |
| rs79005670  | 11  | 101545718 | C  | G  | 0.065 | -0.128 | 0.028 | 4.16E-06 |
| rs80068492  | 15  | 41542957  | A  | G  | 0.039 | -0.163 | 0.035 | 3.61E-06 |
| rs116940507 | 15  | 75566965  | C  | T  | 0.030 | 0.181  | 0.039 | 4.08E-06 |
| rs7184768   | 16  | 81630188  | G  | A  | 0.348 | -0.067 | 0.014 | 2.16E-06 |
| rs117725035 | 17  | 59212300  | A  | G  | 0.027 | 0.409  | 0.040 | 1.09E-24 |
| rs117372722 | 17  | 61401255  | G  | T  | 0.025 | 0.311  | 0.042 | 9.22E-14 |
| rs117885142 | 20  | 2464755   | C  | T  | 0.009 | 0.337  | 0.070 | 1.75E-06 |
| rs145020240 | 20  | 23989840  | C  | T  | 0.060 | -0.152 | 0.029 | 2.35E-07 |

Abbreviation: SNP, single nucleotide polymorphism; Chr, chromosome; A1, Effect\_allele; A2, Other\_allele; EAF, effect allele frequency; SE, standard error.

**Table S4** Mendelian randomization analysis of anemia and heart failure in FinnGen study

| SNP         | Chr | Position  | A1 | A2 | EAF   | Anemia |       |               | Heart failure |       |               |
|-------------|-----|-----------|----|----|-------|--------|-------|---------------|---------------|-------|---------------|
|             |     |           |    |    |       | Beta   | SE    | <i>P</i> -val | Beta          | SE    | <i>P</i> -val |
| rs116940507 | 15  | 75566965  | T  | C  | 0.03  | 0.181  | 0.039 | 4.08E-06      | 0.045         | 0.032 | 0.167         |
| rs117372722 | 17  | 61401255  | T  | G  | 0.025 | 0.311  | 0.042 | 9.22E-14      | 0.055         | 0.035 | 0.117         |
| rs117725035 | 17  | 59212300  | G  | A  | 0.027 | 0.409  | 0.04  | 1.09E-24      | 0.02          | 0.03  | 0.51          |
| rs12615303  | 2   | 26917705  | T  | C  | 0.336 | -0.072 | 0.014 | 4.21E-07      | -0.023        | 0.008 | 0.005         |
| rs145020240 | 20  | 23989840  | T  | C  | 0.06  | -0.152 | 0.029 | 2.35E-07      | -0.026        | 0.02  | 0.194         |
| rs149614393 | 1   | 112820064 | A  | C  | 0.124 | 0.099  | 0.02  | 1.09E-06      | 0.01          | 0.016 | 0.553         |
| rs2169706   | 4   | 19271294  | C  | T  | 0.312 | 0.07   | 0.014 | 1.12E-06      | 0.011         | 0.008 | 0.188         |
| rs35172598  | 6   | 103952813 | C  | T  | 0.113 | -0.116 | 0.022 | 8.50E-08      | 0.000         | 0.01  | 0.986         |
| rs7184768   | 16  | 81630188  | A  | G  | 0.348 | -0.067 | 0.014 | 2.16E-06      | -0.013        | 0.008 | 0.106         |
| rs79005670  | 11  | 101545718 | G  | C  | 0.065 | -0.128 | 0.028 | 4.16E-06      | -0.016        | 0.018 | 0.377         |
| rs80068492  | 15  | 41542957  | G  | A  | 0.039 | -0.163 | 0.035 | 3.61E-06      | 0.068         | 0.04  | 0.085         |
| rs847720    | 7   | 71116080  | C  | T  | 0.727 | 0.069  | 0.015 | 4.32E-06      | -0.002        | 0.008 | 0.779         |

Abbreviation: SNP, single nucleotide polymorphism; Chr, chromosome; A1, Effect\_allele; A2, Other\_allele; EAF, effect allele frequency; SE, standard error.



**Table S5** Mendelian randomization analysis of anemia and coronary artery disease in FinnGen study

| SNP         | Chr | Position  | A1 | A2 | EAF   | Anemia |       |               | Coronary artery disease |       |               |
|-------------|-----|-----------|----|----|-------|--------|-------|---------------|-------------------------|-------|---------------|
|             |     |           |    |    |       | Beta   | SE    | <i>P</i> -val | Beta                    | SE    | <i>P</i> -val |
| rs117372722 | 17  | 61401255  | T  | G  | 0.025 | 0.311  | 0.042 | 9.22E-14      | 0.004                   | 0.063 | 0.951         |
| rs117725035 | 17  | 59212300  | G  | A  | 0.027 | 0.409  | 0.040 | 1.09E-24      | 0.025                   | 0.039 | 0.520         |
| rs12615303  | 2   | 26917705  | T  | C  | 0.336 | -0.072 | 0.014 | 4.21E-07      | -0.025                  | 0.011 | 0.017         |
| rs145020240 | 20  | 23989840  | T  | C  | 0.060 | -0.152 | 0.029 | 2.35E-07      | -0.004                  | 0.035 | 0.904         |
| rs149614393 | 1   | 112820064 | A  | C  | 0.124 | 0.099  | 0.020 | 1.09E-06      | 0.011                   | 0.027 | 0.689         |
| rs2169706   | 4   | 19271294  | C  | T  | 0.312 | 0.070  | 0.014 | 1.12E-06      | 0.014                   | 0.011 | 0.196         |
| rs35172598  | 6   | 103952813 | C  | T  | 0.113 | -0.116 | 0.022 | 8.50E-08      | -0.014                  | 0.014 | 0.306         |
| rs6728914   | 2   | 184421981 | G  | T  | 0.007 | 0.388  | 0.081 | 1.86E-06      | 0.008                   | 0.051 | 0.880         |
| rs7184768   | 16  | 81630188  | A  | G  | 0.348 | -0.067 | 0.014 | 2.16E-06      | -0.007                  | 0.011 | 0.501         |
| rs79005670  | 11  | 101545718 | G  | C  | 0.065 | -0.128 | 0.028 | 4.16E-06      | -0.011                  | 0.029 | 0.711         |
| rs80068492  | 15  | 41542957  | G  | A  | 0.039 | -0.163 | 0.035 | 3.61E-06      | 0.059                   | 0.058 | 0.304         |
| rs847720    | 7   | 71116080  | C  | T  | 0.727 | 0.069  | 0.015 | 4.32E-06      | 0.010                   | 0.012 | 0.374         |

Abbreviation: SNP, single nucleotide polymorphism; Chr, chromosome; A1, Effect\_allele; A2, Other\_allele; EAF, effect allele frequency; SE, standard error.

**Table S6** Mendelian randomization analysis of anemia and atrial fibrillation in FinnGen study

| SNP         | Chr | Position  | A1 | A2 | EAF   | Anemia |       |               | Atrial fibrillation |       |               |
|-------------|-----|-----------|----|----|-------|--------|-------|---------------|---------------------|-------|---------------|
|             |     |           |    |    |       | Beta   | SE    | <i>P</i> -val | Beta                | SE    | <i>P</i> -val |
| rs116940507 | 15  | 75566965  | T  | C  | 0.030 | 0.181  | 0.039 | 4.08E-06      | 0.106               | 0.105 | 0.313         |
| rs117372722 | 17  | 61401255  | T  | G  | 0.025 | 0.311  | 0.042 | 9.22E-14      | 0.168               | 0.106 | 0.114         |
| rs117725035 | 17  | 59212300  | G  | A  | 0.027 | 0.409  | 0.040 | 1.09E-24      | 0.034               | 0.059 | 0.561         |
| rs117885142 | 20  | 2464755   | T  | C  | 0.009 | 0.337  | 0.070 | 1.75E-06      | -0.027              | 0.186 | 0.886         |
| rs12615303  | 2   | 26917705  | T  | C  | 0.336 | -0.072 | 0.014 | 4.21E-07      | 0.015               | 0.013 | 0.245         |
| rs145020240 | 20  | 23989840  | T  | C  | 0.060 | -0.152 | 0.029 | 2.35E-07      | -0.010              | 0.050 | 0.837         |
| rs149614393 | 1   | 112820064 | A  | C  | 0.124 | 0.099  | 0.020 | 1.09E-06      | 0.040               | 0.034 | 0.235         |
| rs2169706   | 4   | 19271294  | C  | T  | 0.312 | 0.070  | 0.014 | 1.12E-06      | 0.016               | 0.013 | 0.235         |
| rs35172598  | 6   | 103952813 | C  | T  | 0.113 | -0.116 | 0.022 | 8.50E-08      | -0.035              | 0.017 | 0.041         |
| rs6728914   | 2   | 184421981 | G  | T  | 0.007 | 0.388  | 0.081 | 1.86E-06      | -0.066              | 0.061 | 0.276         |
| rs7184768   | 16  | 81630188  | A  | G  | 0.348 | -0.067 | 0.014 | 2.16E-06      | -0.009              | 0.013 | 0.494         |
| rs80068492  | 15  | 41542957  | G  | A  | 0.039 | -0.163 | 0.035 | 3.61E-06      | -0.128              | 0.101 | 0.205         |
| rs847720    | 7   | 71116080  | C  | T  | 0.727 | 0.069  | 0.015 | 4.32E-06      | 0.007               | 0.014 | 0.601         |

Abbreviation: SNP, single nucleotide polymorphism; Chr, chromosome; A1, Effect\_allele; A2, Other\_allele; EAF, effect allele frequency; SE, standard error.

**Table S7** Mendelian randomization analysis of anemia and any stroke in FinnGen study

| SNP         | Chr | Position  | A1 | A2 | EAF   | Anemia |       |          | Any stroke |       |       |
|-------------|-----|-----------|----|----|-------|--------|-------|----------|------------|-------|-------|
|             |     |           |    |    |       | Beta   | SE    | P-val    | Beta       | SE    | P-val |
| rs116940507 | 15  | 75566965  | T  | C  | 0.030 | 0.181  | 0.039 | 4.08E-06 | 0.009      | 0.045 | 0.835 |
| rs117372722 | 17  | 61401255  | T  | G  | 0.025 | 0.311  | 0.042 | 9.22E-14 | -0.036     | 0.051 | 0.483 |
| rs117725035 | 17  | 59212300  | G  | A  | 0.027 | 0.409  | 0.040 | 1.09E-24 | -0.054     | 0.036 | 0.130 |
| rs117885142 | 20  | 2464755   | T  | C  | 0.009 | 0.337  | 0.070 | 1.75E-06 | 0.045      | 0.069 | 0.519 |
| rs12615303  | 2   | 26917705  | T  | C  | 0.336 | -0.072 | 0.014 | 4.21E-07 | -0.011     | 0.010 | 0.252 |
| rs145020240 | 20  | 23989840  | T  | C  | 0.060 | -0.152 | 0.029 | 2.35E-07 | -0.018     | 0.027 | 0.513 |
| rs149614393 | 1   | 112820064 | A  | C  | 0.124 | 0.099  | 0.020 | 1.09E-06 | 0.038      | 0.021 | 0.066 |
| rs2169706   | 4   | 19271294  | C  | T  | 0.312 | 0.070  | 0.014 | 1.12E-06 | -0.005     | 0.010 | 0.616 |
| rs35172598  | 6   | 103952813 | C  | T  | 0.113 | -0.116 | 0.022 | 8.50E-08 | -0.028     | 0.012 | 0.019 |
| rs6728914   | 2   | 184421981 | G  | T  | 0.007 | 0.388  | 0.081 | 1.86E-06 | -0.073     | 0.046 | 0.112 |
| rs7184768   | 16  | 81630188  | A  | G  | 0.348 | -0.067 | 0.014 | 2.16E-06 | -0.016     | 0.010 | 0.101 |
| rs79005670  | 11  | 101545718 | G  | C  | 0.065 | -0.128 | 0.028 | 4.16E-06 | 0.005      | 0.023 | 0.838 |
| rs80068492  | 15  | 41542957  | G  | A  | 0.039 | -0.163 | 0.035 | 3.61E-06 | 0.015      | 0.053 | 0.772 |
| rs847720    | 7   | 71116080  | C  | T  | 0.727 | 0.069  | 0.015 | 4.32E-06 | 0.010      | 0.010 | 0.317 |

Abbreviation: SNP, single nucleotide polymorphism; Chr, chromosome; A1, Effect\_allele; A2, Other\_allele; EAF, effect allele frequency; SE, standard error.

**Table S8** Mendelian randomization analysis of anemia and any ischemic stroke in FinnGen study

| SNP         | Chr | Position  | A1 | A2 | EAF   | Anemia |       |          | Any ischemic stroke |       |       |
|-------------|-----|-----------|----|----|-------|--------|-------|----------|---------------------|-------|-------|
|             |     |           |    |    |       | Beta   | SE    | P-val    | Beta                | SE    | P-val |
| rs116940507 | 15  | 75566965  | T  | C  | 0.030 | 0.181  | 0.039 | 4.08E-06 | 0.011               | 0.048 | 0.828 |
| rs117372722 | 17  | 61401255  | T  | G  | 0.025 | 0.311  | 0.042 | 9.22E-14 | -0.054              | 0.055 | 0.325 |
| rs117725035 | 17  | 59212300  | G  | A  | 0.027 | 0.409  | 0.040 | 1.09E-24 | -0.054              | 0.039 | 0.164 |
| rs117885142 | 20  | 2464755   | T  | C  | 0.009 | 0.337  | 0.070 | 1.75E-06 | 0.040               | 0.075 | 0.590 |
| rs12615303  | 2   | 26917705  | T  | C  | 0.336 | -0.072 | 0.014 | 4.21E-07 | -0.013              | 0.011 | 0.234 |
| rs145020240 | 20  | 23989840  | T  | C  | 0.060 | -0.152 | 0.029 | 2.35E-07 | -0.017              | 0.029 | 0.550 |
| rs149614393 | 1   | 112820064 | A  | C  | 0.124 | 0.099  | 0.020 | 1.09E-06 | 0.042               | 0.023 | 0.059 |
| rs2169706   | 4   | 19271294  | C  | T  | 0.312 | 0.070  | 0.014 | 1.12E-06 | -0.005              | 0.011 | 0.623 |
| rs35172598  | 6   | 103952813 | C  | T  | 0.113 | -0.116 | 0.022 | 8.50E-08 | -0.028              | 0.013 | 0.032 |
| rs6728914   | 2   | 184421981 | G  | T  | 0.007 | 0.388  | 0.081 | 1.86E-06 | -0.053              | 0.050 | 0.295 |
| rs7184768   | 16  | 81630188  | A  | G  | 0.348 | -0.067 | 0.014 | 2.16E-06 | -0.018              | 0.010 | 0.081 |
| rs79005670  | 11  | 101545718 | G  | C  | 0.065 | -0.128 | 0.028 | 4.16E-06 | 0.021               | 0.025 | 0.404 |
| rs80068492  | 15  | 41542957  | G  | A  | 0.039 | -0.163 | 0.035 | 3.61E-06 | 0.010               | 0.057 | 0.868 |
| rs847720    | 7   | 71116080  | C  | T  | 0.727 | 0.069  | 0.015 | 4.32E-06 | 0.008               | 0.011 | 0.476 |

Abbreviation: SNP, single nucleotide polymorphism; Chr, chromosome; A1, Effect\_allele; A2, Other\_allele; EAF, effect allele frequency; SE, standard error.

**Table S9** Associations of genetically predicted anemia with risk of cardiovascular disease in the MR-PRESSO analysis in FinnGen study

| <b>Cardiovascular disease</b> | <b>SNP</b> | <b>Outliers</b> | <b>p_glo</b> | <b>p_dis</b> | <b>OR</b> | <b>95% CI</b> | <b>P-val</b> |
|-------------------------------|------------|-----------------|--------------|--------------|-----------|---------------|--------------|
| Heart failure                 | 12         | 0               | 0.314        | NA           | 1.108     | 1.03~1.193    | 0.019        |
| Coronary artery disease       | 12         | 0               | 0.885        | NA           | 1.112     | 1.041~1.188   | 0.009        |
| Atrial fibrillation           | 13         | 0               | 0.365        | NA           | 1.109     | 0.983~1.251   | 0.119        |
| Any stroke                    | 14         | 0               | 0.069        | NA           | 1.038     | 0.946~1.139   | 0.441        |
| Any ischemic stroke           | 14         | 0               | 0.133        | NA           | 1.038     | 0.942~1.143   | 0.463        |

Abbreviation: SNPs, single nucleotide polymorphisms; p\_glo, p value for global test; p\_dis, p value for distortion test; OR, odds ratio; CI, confidence interval; NA, not available.

**Table S10** F statistics for the causal effect of cardiovascular disease on anemia in MR analysis in FinnGen study

| Diseases                | Data sources      | Sample size<br>(cases/controls) | Ancestry | R <sup>2</sup> (%) for CVDs<br>(Total) | F for CVDs<br>(Total) |
|-------------------------|-------------------|---------------------------------|----------|----------------------------------------|-----------------------|
| Heart failure           | HERMES            | 47,309/930,014                  | European | 1.3                                    | 1221.8                |
| Coronary artery disease | CARDIoGRAMplusC4D | 60,801/123,504                  | Mixed    | 8.1                                    | 647.1                 |
| Atrial fibrillation     | AFGen             | 65,446/522,744                  | European | NA                                     | NA                    |
| Any stroke              | MEGASTROKE        | 40,585/406,111                  | European | 1.2                                    | 767.7                 |
| Any ischemic stroke     | MEGASTROKE        | 34,217/406,111                  | European | 1.3                                    | 966.2                 |

FinnGen: the FinnGen Consortium; HERMES; Heart Failure Molecular Epidemiology for Therapeutic Targets; CARDIoGRAMplusC4D, Coronary Artery Disease Genome-wide Replication and Meta-analysis plus The Coronary Artery Disease Genetics; AFGen, Atrial Fibrillation Genetics; MEGASTROKE, the MEGASTROKE Consortium.

Note: R<sup>2</sup>: Variability explained by genetic instruments. The R<sup>2</sup> was calculated using the formula[1]:  $R^2 = \beta^2(1 - 2EAF)$ .  $\beta$  is the association coefficient between the SNP and phenotype, and EAF is the minor allele frequency.

Furthermore, the F statistics were calculated using the formula[2]:  $F = \frac{R^2(N-K-1)}{K(1-R^2)}$ . R<sup>2</sup> is the proportion of the variability of CVD explained by each instrument, K is the number of SNP-CVD association, N is the sample size of the GWAS for the SNP-CVD association.

**Table S11** Mendelian randomization analysis of heart failure and anemia in FinnGen study

| SNP        | Chr | Position  | A1 | A2 | EAF   | Heart failure |       |          | Anemia |       |          |
|------------|-----|-----------|----|----|-------|---------------|-------|----------|--------|-------|----------|
|            |     |           |    |    |       | Beta          | SE    | P-val    | Beta   | SE    | P-val    |
| rs11745324 | 5   | 137676482 | A  | G  | 0.228 | -0.053        | 0.010 | 2.35E-08 | -0.017 | 0.016 | 0.285    |
| rs1510226  | 6   | 160395377 | T  | C  | 0.981 | -0.162        | 0.029 | 1.27E-08 | -0.119 | 0.063 | 0.057    |
| rs17042102 | 4   | 110747470 | A  | G  | 0.115 | 0.110         | 0.012 | 5.71E-20 | 0.049  | 0.019 | 0.012    |
| rs17617337 | 10  | 119667372 | T  | C  | 0.221 | -0.056        | 0.010 | 3.65E-09 | -0.022 | 0.016 | 0.174    |
| rs4135240  | 6   | 36679903  | T  | C  | 0.659 | 0.049         | 0.008 | 6.84E-09 | 0.008  | 0.014 | 0.567    |
| rs4746140  | 10  | 73657491  | C  | G  | 0.154 | -0.067        | 0.011 | 1.10E-09 | -0.026 | 0.018 | 0.135    |
| rs55730499 | 6   | 160584578 | T  | C  | 0.069 | 0.106         | 0.016 | 1.83E-11 | 0.091  | 0.032 | 0.004    |
| rs56094641 | 16  | 53772541  | A  | G  | 0.584 | -0.045        | 0.008 | 1.21E-08 | -0.013 | 0.014 | 0.351    |
| rs600038   | 9   | 133276354 | T  | C  | 0.791 | -0.057        | 0.010 | 3.68E-09 | -0.066 | 0.016 | 3.84E-05 |
| rs660240   | 1   | 109275216 | T  | C  | 0.213 | -0.061        | 0.010 | 3.25E-10 | -0.023 | 0.016 | 0.152    |

Abbreviation: SNP, single nucleotide polymorphism; Chr, chromosome; A1, Effect\_allele; A2, Other\_allele; EAF, effect allele frequency; SE, standard error.

**Table S12** Mendelian randomization analysis of coronary artery disease and anemia in FinnGen study

| SNP         | Chr | Position  | A1 | A2 | EAF   | Coronary artery disease |       |          | Anemia |       |       |
|-------------|-----|-----------|----|----|-------|-------------------------|-------|----------|--------|-------|-------|
|             |     |           |    |    |       | Beta                    | SE    | P-val    | Beta   | SE    | P-val |
| rs10455872  | 6   | 160589086 | G  | A  | 0.054 | 0.285                   | 0.027 | 9.23E-27 | 0.092  | 0.032 | 0.004 |
| rs10947786  | 6   | 39188634  | A  | G  | 0.208 | -0.072                  | 0.013 | 1.77E-08 | -0.022 | 0.015 | 0.138 |
| rs113113862 | 19  | 11072901  | A  | G  | 0.218 | -0.075                  | 0.013 | 2.78E-09 | -0.046 | 0.016 | 0.005 |
| rs11556924  | 7   | 130023656 | T  | C  | 0.298 | -0.069                  | 0.013 | 4.00E-08 | 0.002  | 0.014 | 0.895 |
| rs1332329   | 10  | 89243662  | C  | A  | 0.362 | 0.079                   | 0.011 | 2.68E-13 | 0.001  | 0.014 | 0.939 |
| rs1510226   | 6   | 160395377 | C  | T  | 0.027 | 0.226                   | 0.035 | 6.16E-11 | 0.119  | 0.063 | 0.057 |
| rs1870634   | 10  | 43985363  | G  | T  | 0.618 | 0.070                   | 0.011 | 8.35E-11 | -0.021 | 0.015 | 0.150 |
| rs2019090   | 11  | 103798234 | T  | A  | 0.642 | -0.065                  | 0.011 | 3.65E-09 | -0.001 | 0.016 | 0.952 |
| rs2327426   | 6   | 133881552 | C  | T  | 0.298 | -0.063                  | 0.011 | 1.22E-08 | -0.015 | 0.016 | 0.337 |
| rs2505083   | 10  | 30046193  | C  | T  | 0.395 | 0.061                   | 0.011 | 6.93E-09 | 0.003  | 0.014 | 0.824 |
| rs2681472   | 12  | 89615182  | G  | A  | 0.194 | 0.073                   | 0.013 | 6.11E-09 | -0.028 | 0.025 | 0.278 |
| rs28451064  | 21  | 34221526  | A  | G  | 0.119 | 0.122                   | 0.018 | 6.10E-12 | -0.003 | 0.019 | 0.880 |
| rs35700460  | 1   | 222638065 | G  | A  | 0.647 | 0.082                   | 0.012 | 1.91E-11 | -0.003 | 0.015 | 0.834 |
| rs41290120  | 19  | 44879418  | A  | G  | 0.032 | -0.186                  | 0.031 | 2.62E-09 | -0.035 | 0.040 | 0.376 |
| rs4773141   | 13  | 110302006 | G  | C  | 0.345 | 0.080                   | 0.013 | 4.69E-10 | 0.000  | 0.015 | 0.982 |
| rs4977574   | 9   | 22098575  | G  | A  | 0.482 | 0.189                   | 0.010 | 4.58E-75 | 0.021  | 0.014 | 0.124 |
| rs653178    | 12  | 111569952 | T  | C  | 0.558 | -0.077                  | 0.012 | 2.84E-11 | -0.044 | 0.014 | 0.001 |
| rs7173743   | 15  | 78849442  | C  | T  | 0.432 | -0.064                  | 0.010 | 7.75E-10 | -0.011 | 0.014 | 0.436 |
| rs72689147  | 4   | 155718736 | T  | G  | 0.180 | -0.074                  | 0.013 | 1.65E-08 | -0.020 | 0.016 | 0.212 |
| rs72934535  | 2   | 203104250 | C  | T  | 0.093 | 0.141                   | 0.019 | 3.36E-14 | -0.024 | 0.023 | 0.306 |
| rs7528419   | 1   | 109274570 | G  | A  | 0.202 | -0.101                  | 0.013 | 9.92E-16 | -0.024 | 0.016 | 0.136 |
| rs9349379   | 6   | 12903725  | G  | A  | 0.411 | 0.131                   | 0.011 | 9.37E-35 | 0.026  | 0.013 | 0.053 |
| rs9970807   | 1   | 56499992  | T  | C  | 0.084 | -0.111                  | 0.018 | 1.81E-09 | -0.017 | 0.022 | 0.433 |

Abbreviation: SNP, single nucleotide polymorphism; Chr, chromosome; A1, Effect\_allele; A2, Other\_allele; EAF, effect allele frequency; SE, standard error.



**Table S13** Mendelian randomization analysis of atrial fibrillation and anemia in FinnGen study

| SNP        | Chr | Position  | A1 | A2 | EAF | Atrial fibrillation |       |           | Anemia |       |       |
|------------|-----|-----------|----|----|-----|---------------------|-------|-----------|--------|-------|-------|
|            |     |           |    |    |     | Beta                | SE    | P-val     | Beta   | SE    | P-val |
| rs11264280 | 1   | 154890476 | T  | C  | NA  | 0.115               | 0.014 | 6.41E-17  | 0.014  | 0.014 | 0.314 |
| rs1152591  | 14  | 64214130  | A  | G  | NA  | 0.082               | 0.013 | 1.04E-10  | -0.017 | 0.014 | 0.217 |
| rs11598047 | 10  | 103582915 | A  | G  | NA  | -0.162              | 0.017 | 1.67E-22  | -0.020 | 0.023 | 0.389 |
| rs11718898 | 3   | 12807323  | T  | C  | NA  | -0.073              | 0.013 | 4.68E-08  | 0.017  | 0.014 | 0.208 |
| rs12664873 | 6   | 122142045 | T  | G  | NA  | 0.078               | 0.014 | 1.19E-08  | -0.006 | 0.016 | 0.704 |
| rs2106261  | 16  | 73017721  | T  | C  | NA  | 0.185               | 0.016 | 8.18E-32  | 0.010  | 0.016 | 0.533 |
| rs2288327  | 2   | 178546938 | A  | G  | NA  | -0.089              | 0.016 | 2.05E-08  | 0.034  | 0.018 | 0.057 |
| rs28681402 | 4   | 110850907 | T  | G  | NA  | 0.138               | 0.013 | 7.90E-26  | -0.011 | 0.014 | 0.444 |
| rs2967791  | 5   | 137677417 | T  | C  | NA  | 0.072               | 0.013 | 2.73E-08  | 0.013  | 0.013 | 0.346 |
| rs337711   | 5   | 114412874 | T  | C  | NA  | 0.070               | 0.013 | 2.93E-08  | -0.004 | 0.014 | 0.775 |
| rs3771537  | 2   | 69811660  | A  | C  | NA  | 0.085               | 0.012 | 7.92E-12  | 0.022  | 0.013 | 0.101 |
| rs4946333  | 6   | 118244502 | A  | G  | NA  | -0.074              | 0.012 | 1.89E-09  | -0.001 | 0.013 | 0.967 |
| rs520525   | 1   | 170669192 | A  | G  | NA  | 0.113               | 0.014 | 6.39E-16  | 0.012  | 0.016 | 0.428 |
| rs6843082  | 4   | 110796911 | A  | G  | NA  | -0.371              | 0.014 | 3.41E-155 | -0.038 | 0.015 | 0.009 |
| rs7026071  | 9   | 94730238  | T  | C  | NA  | 0.091               | 0.013 | 1.31E-12  | 0.019  | 0.014 | 0.180 |
| rs74022964 | 15  | 73384923  | T  | C  | NA  | 0.111               | 0.017 | 2.37E-11  | -0.019 | 0.017 | 0.264 |
| rs7508     | 8   | 18056461  | A  | G  | NA  | 0.088               | 0.014 | 5.16E-10  | 0.014  | 0.015 | 0.353 |
| rs75190942 | 11  | 128894676 | A  | C  | NA  | 0.159               | 0.028 | 1.59E-08  | 0.020  | 0.023 | 0.381 |
| rs7915134  | 10  | 73660422  | T  | C  | NA  | -0.113              | 0.018 | 1.68E-10  | -0.027 | 0.019 | 0.152 |
| rs80056983 | 10  | 103750144 | T  | C  | NA  | 0.115               | 0.018 | 8.41E-11  | 0.016  | 0.021 | 0.436 |
| rs883079   | 12  | 114355435 | T  | C  | NA  | 0.108               | 0.014 | 1.80E-15  | -0.007 | 0.014 | 0.643 |

Abbreviation: SNP, single nucleotide polymorphism; Chr, chromosome; A1, Effect\_allele; A2, Other\_allele; EAF, effect allele frequency; SE, standard error.

**Table S14** Mendelian randomization analysis of any stroke and anemia in FinnGen study

| SNP         | Chr | Position  | A1 | A2 | EAF   | Any stroke |       |          | Anemia |       |       |
|-------------|-----|-----------|----|----|-------|------------|-------|----------|--------|-------|-------|
|             |     |           |    |    |       | Beta       | SE    | P-val    | Beta   | SE    | P-val |
| rs10774624* | 12  | 111395984 | A  | G  | 0.529 | -0.065     | 0.009 | 4.04E-12 | -0.046 | 0.014 | 0.001 |
| rs11242678  | 6   | 1336945   | T  | C  | 0.255 | 0.064      | 0.011 | 8.71E-10 | -0.016 | 0.015 | 0.273 |
| rs11587860  | 1   | 156187160 | C  | G  | 0.355 | -0.069     | 0.010 | 2.54E-12 | 0.002  | 0.014 | 0.896 |
| rs1537375   | 9   | 22116072  | T  | C  | 0.498 | -0.052     | 0.009 | 1.24E-08 | -0.025 | 0.014 | 0.062 |
| rs2107595   | 7   | 19009765  | A  | G  | 0.167 | 0.080      | 0.012 | 3.59E-11 | 0.028  | 0.017 | 0.099 |
| rs2634074   | 4   | 110755885 | A  | T  | 0.789 | -0.084     | 0.011 | 6.56E-14 | -0.036 | 0.016 | 0.025 |
| rs475937    | 11  | 102816969 | A  | C  | 0.132 | 0.076      | 0.014 | 2.92E-08 | -0.017 | 0.016 | 0.285 |
| rs4942561   | 13  | 46635212  | T  | G  | 0.758 | 0.064      | 0.011 | 2.05E-09 | 0.008  | 0.016 | 0.608 |

Abbreviation: SNP, single nucleotide polymorphism; Chr, chromosome; A1, Effect\_allele; A2, Other\_allele; EAF, effect allele frequency; SE, standard error; "rs10774624\*" was removed as outliers in the MR-PRESSO analysis.

**Table S15** Mendelian randomization analysis of any ischemic stroke and anemia in FinnGen study

| SNP        | Chr | Position  | A1 | A2 | EAF   | Any ischemic stroke |       |          | Anemia |       |          |
|------------|-----|-----------|----|----|-------|---------------------|-------|----------|--------|-------|----------|
|            |     |           |    |    |       | Beta                | SE    | P-val    | Beta   | SE    | P-val    |
| rs11242678 | 6   | 1336945   | T  | C  | 0.255 | 0.072               | 0.011 | 2.70E-10 | -0.016 | 0.015 | 0.273    |
| rs2066864  | 4   | 154604543 | A  | G  | 0.245 | 0.063               | 0.012 | 3.51E-08 | 0.019  | 0.015 | 0.196    |
| rs2107595  | 7   | 19009765  | A  | G  | 0.167 | 0.088               | 0.013 | 2.33E-11 | 0.028  | 0.017 | 0.099    |
| rs2634074  | 4   | 110755885 | A  | T  | 0.788 | -0.094              | 0.012 | 5.91E-15 | -0.036 | 0.016 | 0.025    |
| rs3184504  | 12  | 111446804 | T  | C  | 0.472 | 0.078               | 0.010 | 1.23E-14 | 0.040  | 0.014 | 0.003    |
| rs473238*  | 11  | 102829629 | T  | C  | 0.133 | 0.083               | 0.015 | 1.65E-08 | -0.018 | 0.016 | 0.263    |
| rs4942561  | 13  | 46635212  | T  | G  | 0.759 | 0.066               | 0.012 | 1.77E-08 | 0.008  | 0.016 | 0.608    |
| rs635634*  | 9   | 133279427 | T  | C  | 0.192 | 0.077               | 0.013 | 9.18E-09 | 0.071  | 0.017 | 2.55E-05 |

Abbreviation: SNP, single nucleotide polymorphism; Chr, chromosome; A1, Effect\_allele; A2, Other\_allele; EAF, effect allele frequency; SE, standard error; “rs2634074\*” and “rs4942561\*” was removed as outliers in the MR-PRESSO analysis.

**Table S16** Associations of genetically predicted anemia with risk of cardiovascular disease in the MR-PRESSO analysis in FinnGen study

| <b>Cardiovascular disease</b> | <b>SNP</b> | <b>Outliers</b> | <b><i>P</i>_glo</b> | <b><i>P</i>_dis</b> | <b>OR</b> | <b>95%CI</b> | <b><i>P</i>-val</b> |
|-------------------------------|------------|-----------------|---------------------|---------------------|-----------|--------------|---------------------|
| Heart failure                 | 10         | 0               | 0.441               | NA                  | 1.639     | 1.372~1.958  | 4.10E-04            |
| Coronary artery disease       | 23         | 0               | 0.098               | NA                  | 1.155     | 1.066~1.252  | 0.002               |
| Atrial fibrillation           | 21         | 0               | 0.343               | NA                  | 1.064     | 1.009~1.121  | 0.032               |
| Any stroke                    | 8          | 1               | 0.02                | 0.175               | 1.223     | 0.961~1.558  | 0.146               |
| Any stroke*                   | 7          | 0               | 0.093               | NA                  | 1.133     | 0.905~1.419  | 0.317               |
| Any ischemic stroke           | 8          | 2               | 0.001               | 0.988               | 1.307     | 1.014~1.685  | 0.078               |
| Any ischemic stroke*          | 6          | 0               | 0.153               | NA                  | 1.302     | 1.057~1.603  | 0.056               |

Abbreviation: SNPs, single nucleotide polymorphisms; *p*\_glo, *p* value for global test; *p*\_dis, *p* value for distortion test; OR, odds ratio; CI, confidence interval; NA, not available; Any stroke\*, “rs10774624” was removed as outliers in the MR-PRESSO analysis; Any ischemic stroke\*, “rs2634074” and “rs4942561” was removed as outliers in the MR-PRESSO analysis.

**Table S17** MR-Steiger test in two-sample bidirectional Mendelian randomization analysis in FinnGen study

| <b>Exposure</b>            | <b>Outcome</b>             | <b>SNP_r<sup>2</sup>.exposure</b> | <b>SNP_r<sup>2</sup>.outcome</b> | <b>Correct_causal<br/>_direction</b> | <b>Steiger_pval</b> |
|----------------------------|----------------------------|-----------------------------------|----------------------------------|--------------------------------------|---------------------|
| Anemia                     | Heart failure              | 0.020                             | 1.51E-06                         | TRUE                                 | 2.01E-27            |
| Anemia                     | Coronary<br>artery disease | 0.020                             | 2.10E-05                         | TRUE                                 | 1.41E-25            |
| Heart failure              | Anemia                     | 0.000                             | 1.59E-05                         | TRUE                                 | 6.31E-10            |
| Coronary artery<br>disease | Anemia                     | 0.003                             | 5.67E-05                         | TRUE                                 | 2.18E-63            |
| Atrial fibrillation        | Anemia                     | 0.002                             | 2.95E-05                         | TRUE                                 | 1.31E-84            |
| Any ischemic stroke        | Anemia                     | 0.001                             | 1.33E-05                         | TRUE                                 | 1.07E-17            |

**Table S18** Information on instrumental variables for anemia in UK Biobank study

| <b>SNP</b> | <b>Chr</b> | <b>A1</b> | <b>A2</b> | <b>EAF</b> | <b>Beta</b> | <b>SE</b> | <b>P-val</b> |
|------------|------------|-----------|-----------|------------|-------------|-----------|--------------|
| rs11863726 | 16         | G         | A         | 0.501      | 0.094       | 0.456     | 1.22E-06     |
| rs1894251  | 22         | T         | C         | 0.078      | 0.183       | 0.915     | 5.99E-07     |
| rs35239007 | 6          | A         | C         | 0.118      | 0.143       | 0.666     | 3.24E-06     |
| rs7189975  | 16         | A         | G         | 0.472      | 0.093       | 0.450     | 1.18E-06     |
| rs8099569  | 18         | A         | G         | 0.077      | 0.184       | 0.929     | 4.62E-07     |

Abbreviation: SNP, single nucleotide polymorphism; Chr, chromosome; A1, Effect\_allele; A2, Other\_allele; EAF, effect allele frequency; SE, standard error.

**Table S19** Mendelian randomization analysis of anemia and cardiovascular disease in UK Biobank study

| <b>Cardiovascular disease</b>  | <b>Method</b>                       | <b>SNP</b> | <b>Beta</b> | <b>SE</b> | <b>OR</b> | <b>95%CI</b>   | <b>P-val</b> |
|--------------------------------|-------------------------------------|------------|-------------|-----------|-----------|----------------|--------------|
| <b>Heart failure</b>           | IVW (fixed effects)                 | 5          | 0.046       | 0.056     | 1.047     | 0.939~1.168    | 0.409        |
|                                | IVW (multiplicative random effects) | 5          | 0.046       | 0.025     | 1.047     | 0.997~1.099    | 0.064        |
|                                | Maximum likelihood                  | 5          | 0.100       | 0.293     | 1.105     | 0.623~1.961    | 0.733        |
|                                | MR Egger                            | 5          | 0.021       | 0.225     | 1.021     | 0.656~1.589    | 0.932        |
|                                | Weighted median                     | 5          | 0.012       | 2.709     | 1.012     | 0.005~204.651  | 0.996        |
|                                | RAPS                                | 5          | 0.100       | 0.310     | 1.105     | 0.602~2.028    | 0.748        |
|                                | MR-PRESSO                           | 5          | 0.046       | 0.025     | 1.047     | 0.997~1.099    | 0.137        |
| <b>Coronary artery disease</b> | IVW (fixed effects)                 | 5          | -0.004      | 0.068     | 0.996     | 0.872~1.138    | 0.955        |
|                                | IVW (multiplicative random effects) | 5          | -0.004      | 0.067     | 0.996     | 0.874~1.135    | 0.955        |
|                                | Maximum likelihood                  | 5          | -7.753      | 89.250    | 0.000     | 0~4.02E+72     | 0.931        |
|                                | MR Egger                            | 5          | -0.078      | 0.296     | 0.925     | 0.518~1.653    | 0.810        |
|                                | Weighted median                     | 5          | 0.014       | 0.240     | 1.014     | 0.633~1.625    | 0.952        |
|                                | RAPS                                | 5          | 0.563       | 3.973     | 1.756     | 0.001~4230.364 | 0.887        |
|                                | MR-PRESSO                           | 5          | -0.004      | 0.067     | 0.996     | 0.874~1.135    | 0.957        |
| <b>Atrial fibrillation</b>     | IVW (fixed effects)                 | 5          | -0.024      | 0.089     | 0.976     | 0.819~1.163    | 0.786        |
|                                | IVW (multiplicative random effects) | 5          | -0.024      | 0.109     | 0.976     | 0.788~1.209    | 0.824        |
|                                | Maximum likelihood                  | 5          | -1.598      | 11.678    | 0.202     | 0~1763400900   | 0.891        |
|                                | MR Egger                            | 5          | 0.001       | 0.509     | 1.001     | 0.369~2.715    | 0.998        |
|                                | Weighted median                     | 5          | -0.142      | 0.141     | 0.868     | 0.658~1.145    | 0.315        |
|                                | RAPS                                | 5          | -2.339      | 49.644    | 0.096     | 0~1.75E+41     | 0.962        |
|                                | MR-PRESSO                           | 5          | -0.024      | 0.109     | 0.976     | 0.788~1.209    | 0.835        |
| <b>Any stroke</b>              | IVW (fixed effects)                 | 5          | -0.054      | 0.071     | 0.947     | 0.824~1.088    | 0.442        |
|                                | IVW (multiplicative random effects) | 5          | -0.054      | 0.080     | 0.947     | 0.809~1.108    | 0.498        |
|                                | Maximum likelihood                  | 5          | -1.433      | 11.683    | 0.239     | 0~2100028637   | 0.902        |
|                                | MR Egger                            | 5          | 0.171       | 0.341     | 1.186     | 0.608~2.312    | 0.651        |
|                                | Weighted median                     | 5          | -0.028      | 0.604     | 0.972     | 0.298~3.174    | 0.963        |
|                                | RAPS                                | 5          | -2.116      | 49.380    | 0.120     | 0~1.3E+41      | 0.966        |
|                                | MR-PRESSO                           | 5          | -0.054      | 0.080     | 0.947     | 0.809~1.108    | 0.535        |
| <b>Any ischemic stroke</b>     | IVW (fixed effects)                 | 5          | -0.052      | 0.075     | 0.949     | 0.819~1.1      | 0.486        |
|                                | IVW (multiplicative random effects) | 5          | -0.052      | 0.086     | 0.949     | 0.802~1.123    | 0.541        |
|                                | Maximum likelihood                  | 5          | -1.356      | 7.803     | 0.258     | 0~1130136.753  | 0.862        |
|                                | MR Egger                            | 5          | 0.203       | 0.366     | 1.226     | 0.598~2.51     | 0.617        |
|                                | Weighted median                     | 5          | -0.048      | 0.786     | 0.954     | 0.204~4.452    | 0.952        |
|                                | RAPS                                | 5          | -2.450      | 59.290    | 0.086     | 0~2.5E+49      | 0.967        |
|                                | MR-PRESSO                           | 5          | -0.052      | 0.086     | 0.949     | 0.802~1.123    | 0.574        |

Abbreviation: SNPs, Single nucleotide polymorphisms; SE, standard error; OR, Odds ratio; CI, Confidence interval; IVW, inverse-variance weighted; IVW (fixed), fixed-effects inverse-variance weighted; MR-RAPS, MR-robust adjusted profile score; MR-PRESSO, MR-pleiotropy residual sum and outlier.



**Table S20** Associations of genetically predicted anemia with risk of cardiovascular disease in sensitivity analysis in UK Biobank study

| Cardiovascular disease  | Heterogeneity test MR-Egger |      |        | Heterogeneity test IVW |      |        | Pleiotropy test |       |       |
|-------------------------|-----------------------------|------|--------|------------------------|------|--------|-----------------|-------|-------|
|                         | Q                           | Q_df | Q_pval | Q                      | Q_df | Q_pval | egger_intercept | SE    | P-val |
| Heart failure           | 0.779                       | 3    | 0.854  | 0.792                  | 4    | 0.939  | 0.003           | 0.029 | 0.916 |
| Coronary artery disease | 3.778                       | 3    | 0.287  | 3.862                  | 4    | 0.425  | 0.011           | 0.041 | 0.813 |
| Atrial fibrillation     | 5.990                       | 3    | 0.112  | 5.995                  | 4    | 0.199  | -0.003          | 0.066 | 0.962 |
| Any stroke              | 4.456                       | 3    | 0.216  | 5.149                  | 4    | 0.272  | -0.029          | 0.043 | 0.544 |
| Any ischemic stroke     | 4.429                       | 3    | 0.219  | 5.200                  | 4    | 0.267  | -0.034          | 0.046 | 0.522 |

Abbreviation: MR, Mendelian randomization; Q, heterogeneity statistic Q; Q\_df, degree of freedom.

**Table S21** Mendelian randomization analysis of cardiovascular disease and anemia in UK Biobank study

| <b>Cardiovascular disease</b>   | <b>Method</b>                       | <b>SNP</b> | <b>Beta</b> | <b>SE</b> | <b>OR</b> | <b>95%CI</b> | <b>P-val</b> |
|---------------------------------|-------------------------------------|------------|-------------|-----------|-----------|--------------|--------------|
| <b>Heart failure*</b>           | IVW (fixed effects)                 | 5          | 0.003       | 0.000     | 1.003     | 1.002~1.004  | 1.58E-10     |
|                                 | IVW (multiplicative random effects) | 5          | 0.003       | 0.000     | 1.003     | 1.002~1.004  | 1.94E-10     |
|                                 | Maximum likelihood                  | 5          | 0.003       | 0.001     | 1.003     | 1.002~1.004  | 1.66E-08     |
|                                 | MR Egger                            | 5          | 0.002       | 0.001     | 1.002     | 1~1.004      | 0.201        |
|                                 | Weighted median                     | 5          | 0.003       | 0.001     | 1.003     | 1.002~1.004  | 3.01E-06     |
|                                 | RAPS                                | 5          | 0.003       | 0.001     | 1.003     | 1.002~1.004  | 9.95E-08     |
|                                 | MR-PRESSO                           | 5          | 0.003       | 0.000     | 1.003     | 1.002~1.004  | 0.003        |
| <b>Coronary artery disease*</b> | IVW (fixed effects)                 | 10         | -0.001      | 0.001     | 0.999     | 0.998~1      | 0.231        |
|                                 | IVW (multiplicative random effects) | 10         | -0.001      | 0.001     | 0.999     | 0.998~1.001  | 0.381        |
|                                 | Maximum likelihood                  | 10         | -0.001      | 0.001     | 0.999     | 0.998~1      | 0.206        |
|                                 | MR Egger                            | 10         | 0.001       | 0.003     | 1.001     | 0.995~1.008  | 0.726        |
|                                 | Weighted median                     | 10         | -0.002      | 0.001     | 0.998     | 0.996~1      | 0.031        |
|                                 | RAPS                                | 10         | 0.000       | 0.001     | 1.000     | 0.998~1.002  | 0.903        |
|                                 | MR-PRESSO                           | 10         | -0.001      | 0.001     | 0.999     | 0.998~1.001  | 0.404        |
|                                 |                                     |            |             |           |           |              |              |
| <b>Atrial fibrillation*</b>     | IVW (fixed effects)                 | 10         | 0.001       | 0.000     | 1.001     | 1~1.001      | 0.094        |
|                                 | IVW (multiplicative random effects) | 10         | 0.001       | 0.000     | 1.001     | 1~1.002      | 0.248        |
|                                 | Maximum likelihood                  | 10         | 0.001       | 0.000     | 1.001     | 1~1.001      | 0.092        |
|                                 | MR Egger                            | 10         | -0.001      | 0.001     | 0.999     | 0.997~1      | 0.089        |
|                                 | Weighted median                     | 10         | 0.001       | 0.001     | 1.001     | 1~1.002      | 0.196        |
|                                 | RAPS                                | 10         | 0.000       | 0.001     | 1.000     | 0.999~1.001  | 0.888        |
|                                 | MR-PRESSO                           | 10         | 0.001       | 0.000     | 1.001     | 1~1.002      | 0.278        |
|                                 |                                     |            |             |           |           |              |              |
| <b>Any stroke</b>               | IVW (fixed effects)                 | 4          | 0.003       | 0.000     | 1.003     | 1.003~1.003  | 7.50E-120    |
|                                 | IVW (multiplicative random effects) | 4          | 0.003       | 0.001     | 1.003     | 1.001~1.005  | 0.002        |
|                                 | Maximum likelihood                  | 4          | 0.003       | 0.001     | 1.003     | 1.002~1.004  | 1.49E-07     |
|                                 | MR Egger                            | 4          | -0.026      | 0.069     | 0.974     | 0.851~1.114  | 0.739        |
|                                 | Weighted median                     | 4          | 0.003       | 0.001     | 1.003     | 1.001~1.005  | 0.006        |
|                                 | RAPS                                | 4          | 0.001       | 0.002     | 1.001     | 0.998~1.005  | 0.498        |
|                                 | MR-PRESSO                           | 4          | 0.003       | 0.001     | 1.003     | 1.001~1.005  | 0.052        |
| <b>Any ischemic stroke</b>      | IVW (fixed effects)                 | 5          | 0.002       | 0.000     | 1.002     | 1.002~1.003  | 1.17E-110    |
|                                 | IVW (multiplicative random effects) | 5          | 0.002       | 0.001     | 1.002     | 1.001~1.004  | 0.003        |
|                                 | Maximum likelihood                  | 5          | 0.003       | 0.001     | 1.003     | 1.001~1.004  | 0.000        |
|                                 | MR Egger                            | 5          | -0.048      | 0.019     | 0.953     | 0.919~0.989  | 0.084        |
|                                 | Weighted median                     | 5          | 0.002       | 0.001     | 1.002     | 1~1.005      | 0.055        |
|                                 | RAPS                                | 5          | 0.001       | 0.001     | 1.001     | 0.999~1.004  | 0.296        |
|                                 | MR-PRESSO                           | 5          | 0.002       | 0.001     | 1.002     | 1.001~1.004  | 0.039        |

Abbreviation: SNPs, Single nucleotide polymorphisms; SE, standard error; OR, Odds ratio; CI, Confidence interval; IVW, inverse-variance weighted; IVW (fixed), fixed-effects inverse-variance weighted; MR-RAPS, MR-robust adjusted profile score; MR-PRESSO, MR-pleiotropy residual sum and outlier; Heart failure\*, “rs11745324” was removed as outliers in the MR-PRESSO analysis; Coronary artery disease\*, “rs1870634” and “rs653178” were removed as outliers in the MR-PRESSO analysis; Atrial fibrillation\*, “rs12664873” and “rs6843082” were removed as outliers in the MR-PRESSO analysis.

**Table S22** Associations of genetically predicted cardiovascular disease with risk of anemia in sensitivity analysis in UK Biobank study

| Cardiovascular disease   | Heterogeneity test MR-Egger |      |          | Heterogeneity test IVW |      |          | Pleiotropy test |          |       |
|--------------------------|-----------------------------|------|----------|------------------------|------|----------|-----------------|----------|-------|
|                          | Q                           | Q_df | Q_pval   | Q                      | Q_df | Q_pval   | egger_intercept | SE       | P-val |
| Heart failure            | 23.473                      | 4    | 1.02E-04 | 23.484                 | 5    | 2.73E-04 | -8.38E-06       | 1.87E-04 | 0.966 |
| Heart failure*           | 2.900                       | 3    | 0.407    | 4.040                  | 4    | 0.401    | 8.53E-05        | 7.99E-05 | 0.364 |
| Coronary artery disease  | 29.873                      | 10   | 8.99E-04 | 29.933                 | 11   | 0.002    | -4.44E-05       | 3.11E-04 | 0.889 |
| Coronary artery disease* | 16.129                      | 8    | 0.041    | 16.816                 | 9    | 0.052    | -0.00016        | 2.74E-04 | 0.576 |
| Atrial fibrillation      | 22.148                      | 9    | 0.008    | 26.538                 | 10   | 0.003    | 1.50E-04        | 1.12E-04 | 0.214 |
| Atrial fibrillation*     | 7.982                       | 8    | 0.435    | 18.876                 | 9    | 0.026    | 2.53E-04        | 7.67E-05 | 0.011 |
| Any stroke               | 152.197                     | 2    | 8.93E-34 | 165.843                | 3    | 1.00E-35 | 0.002           | 0.004    | 0.713 |
| Any ischemic stroke      | 65.275                      | 3    | 4.38E-14 | 220.099                | 4    | 1.79E-46 | 0.004           | 0.001    | 0.076 |

Abbreviation: MR, Mendelian randomization; Q, heterogeneity statistic Q; Q\_df, degree of freedom. Heart failure\*, “rs11745324” was removed as outliers in the MR-PRESSO analysis; Coronary artery disease\*, “rs1870634” and “rs653178” were removed as outliers in the MR-PRESSO analysis; Atrial fibrillation\*, “rs12664873” and “rs6843082” were removed as outliers in the MR-PRESSO analysis.

**Table S23** Associations of genetic liability to anemia with risk of cardiovascular disease in UK Biobank and FinnGen studies

| <b>Cardiovascular disease</b>  | <b>Studies</b> | <b>SNP</b> | <b>OR</b> | <b>LCI</b> | <b>UCI</b> | <b>P-val</b> |
|--------------------------------|----------------|------------|-----------|------------|------------|--------------|
| <b>Heart failure</b>           | UK Biobank     | 5          | 1.047     | 0.939      | 1.168      | 0.409        |
|                                | FinnGen        | 12         | 1.108     | 1.037      | 1.184      | 0.002        |
|                                | Combined       |            | 1.092     | 1.032      | 1.155      | 0.002        |
| <b>Coronary artery disease</b> | UK Biobank     | 5          | 0.996     | 0.872      | 1.138      | 0.955        |
|                                | FinnGen        | 12         | 1.112     | 1.017      | 1.216      | 0.020        |
|                                | Combined       |            | 1.075     | 0.998      | 1.158      | 0.056        |
| <b>Atrial fibrillation</b>     | UK Biobank     | 5          | 0.947     | 0.824      | 1.088      | 0.442        |
|                                | FinnGen        | 13         | 1.038     | 0.963      | 1.120      | 0.330        |
|                                | Combined       |            | 1.017     | 0.951      | 1.087      | 0.627        |
| <b>Any stroke</b>              | UK Biobank     | 5          | 0.947     | 0.824      | 1.088      | 0.442        |
|                                | FinnGen        | 14         | 1.038     | 0.963      | 1.120      | 0.330        |
|                                | Combined       |            | 1.017     | 0.951      | 1.087      | 0.627        |
| <b>Any ischemic stroke</b>     | UK Biobank     | 5          | 0.949     | 0.819      | 1.100      | 0.486        |
|                                | FinnGen        | 14         | 1.038     | 0.956      | 1.127      | 0.374        |
|                                | Combined       |            | 1.016     | 0.946      | 1.092      | 0.662        |

Abbreviation: SNPs, Single nucleotide polymorphisms; OR, Odds ratio; LCI, Lower confidence interval; UCI, Upper confidence interval.

**Table S24** Associations of genetic liability to cardiovascular disease with risk of anemia in UK Biobank and FinnGen studies

| <b>Cardiovascular disease</b>  | <b>Studies</b> | <b>SNP</b> | <b>OR</b> | <b>LCI</b> | <b>UCI</b> | <b>P-val</b> |
|--------------------------------|----------------|------------|-----------|------------|------------|--------------|
| <b>Heart failure</b>           | UK Biobank     | 6          | 1.002     | 1.002      | 1.003      | 1.01E-07     |
|                                | FinnGen        | 10         | 1.639     | 1.386      | 1.938      | 7.60E-09     |
|                                | Combined       |            | 1.272     | 0.786      | 2.060      | 0.328        |
| <b>Coronary artery disease</b> | UK Biobank     | 10         | 0.999     | 0.998      | 1.000      | 0.231        |
|                                | FinnGen        | 23         | 1.155     | 1.080      | 1.235      | 2.32E-05     |
|                                | Combined       |            | 1.070     | 0.928      | 1.233      | 0.351        |
| <b>Atrial fibrillation</b>     | UK Biobank     | 10         | 1.001     | 1.000      | 1.002      | 0.248        |
|                                | FinnGen        | 21         | 1.064     | 1.012      | 1.118      | 0.015        |
|                                | Combined       |            | 1.001     | 1.000      | 1.002      | 0.045        |
| <b>Any stroke</b>              | UK Biobank     | 4          | 1.003     | 1.001      | 1.005      | 0.002        |
|                                | FinnGen        | 7          | 1.133     | 0.964      | 1.332      | 0.13         |
|                                | Combined       |            | 1.003     | 1.001      | 1.005      | 0.003        |
| <b>Any ischemic stroke</b>     | UK Biobank     | 5          | 1.002     | 1.001      | 1.004      | 0.003        |
|                                | FinnGen        | 6          | 1.302     | 1.112      | 1.524      | 0.001        |
|                                | Combined       |            | 1.128     | 0.874      | 1.457      | 0.355        |

Abbreviation: SNPs, Single nucleotide polymorphisms; OR, Odds ratio; LCI, Lower confidence interval; UCI, Upper confidence interval.

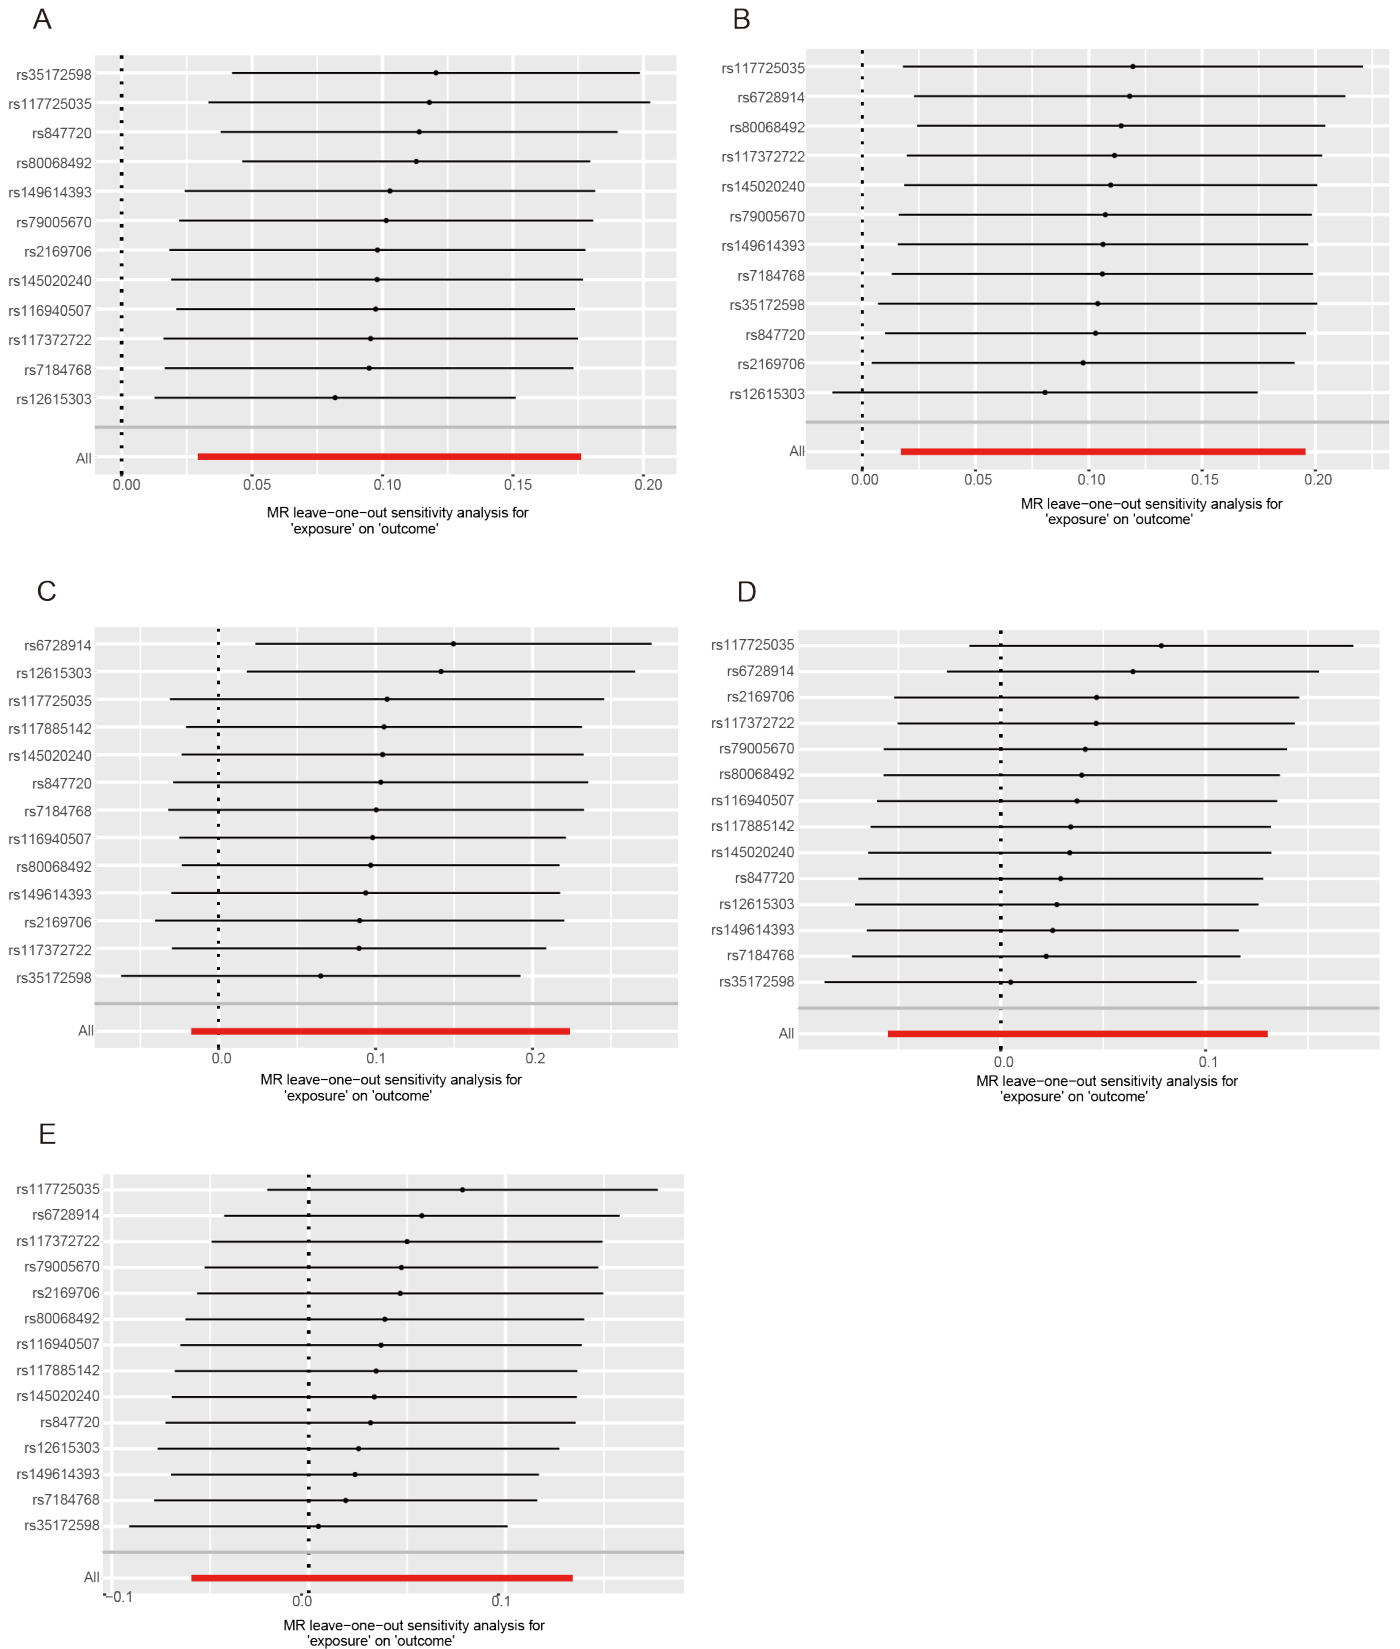

**Figure S1** Leave-one-out sensitivity analysis in the Mendelian randomization analysis of anemia and cardiovascular disease in FinnGen study. (A) Anemia and Heart failure; (B) Anemia and Coronary artery disease; (C) Anemia and Atrial fibrillation; (D) Anemia and Any stroke; (E) Anemia and Any ischemic stroke.

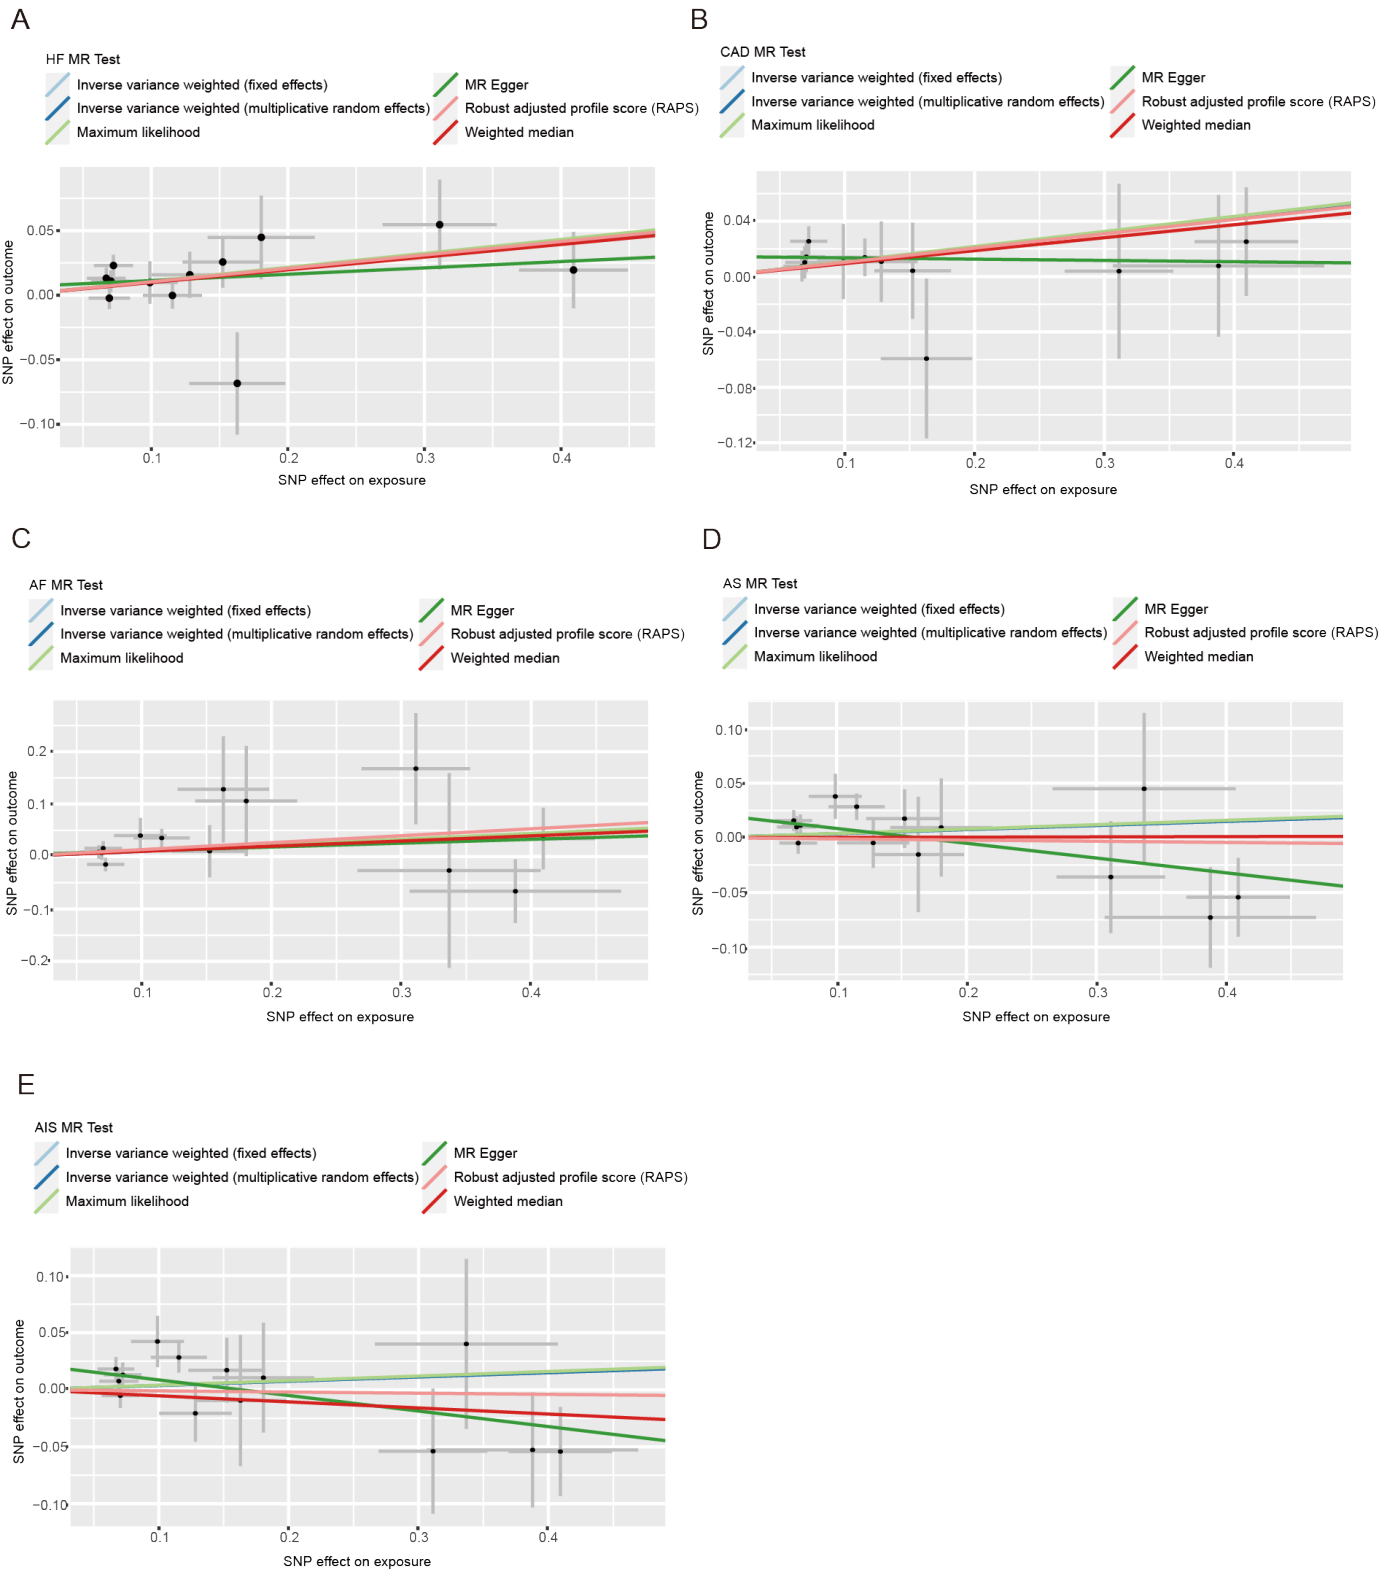

**Figure S2** Scatter\_plot in the Mendelian randomization analysis of anemia and cardiovascular disease in FinnGen study. (A) Anemia and Heart failure; (B) Anemia and Coronary artery disease; (C) Anemia and Atrial fibrillation; (D) Anemia and Any stroke; (E) Anemia and Any ischemic stroke.



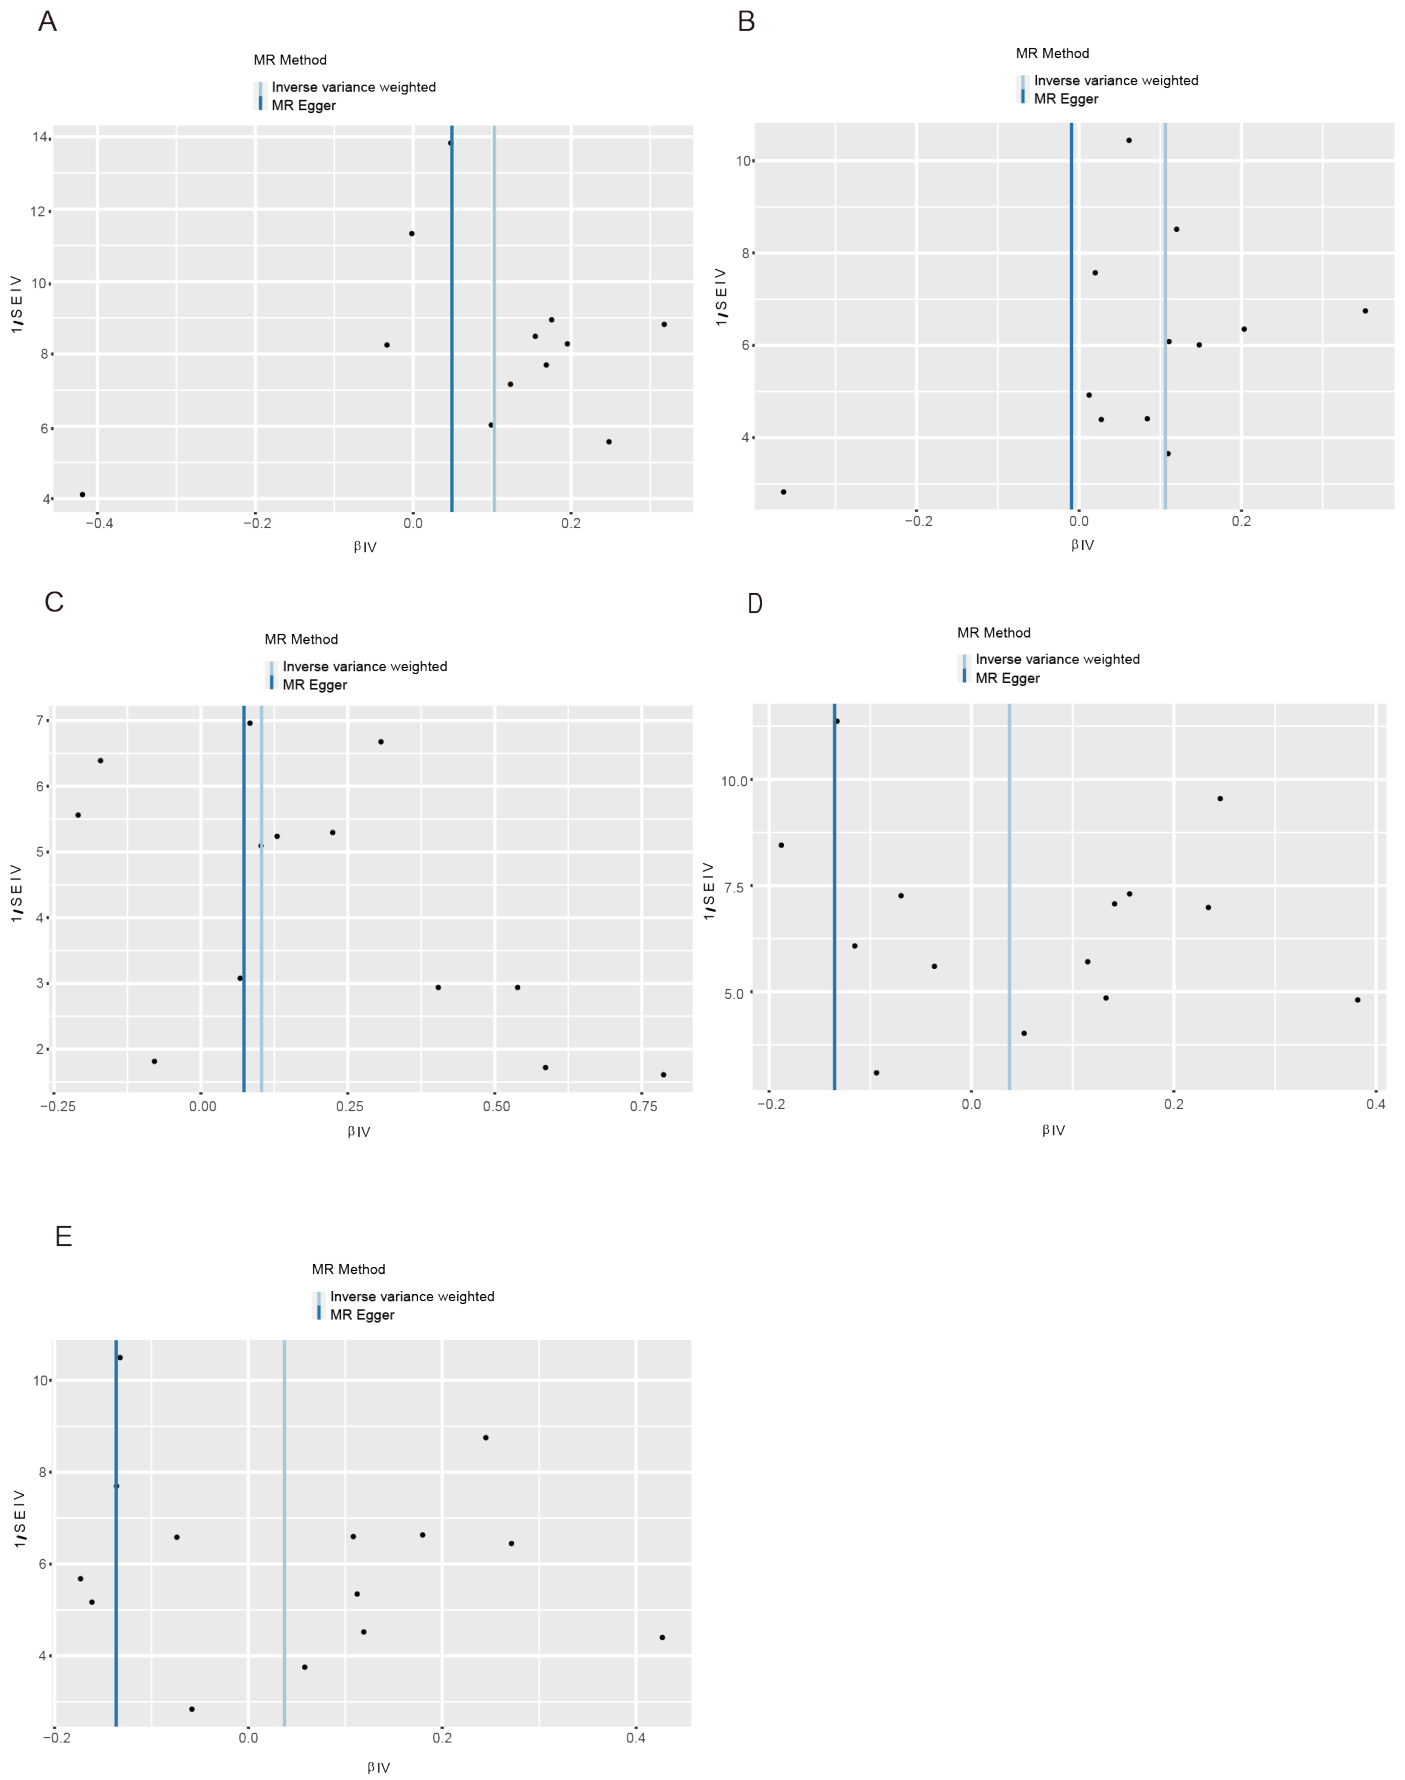

**Figure S3** Funnel\_plot in the Mendelian randomization analysis of anemia and cardiovascular disease in FinnGen study. (A) Anemia and Heart failure; (B) Anemia and Coronary artery disease; (C) Anemia and Atrial fibrillation; (D) Anemia and Any stroke; (E) Anemia and Any ischemic stroke.

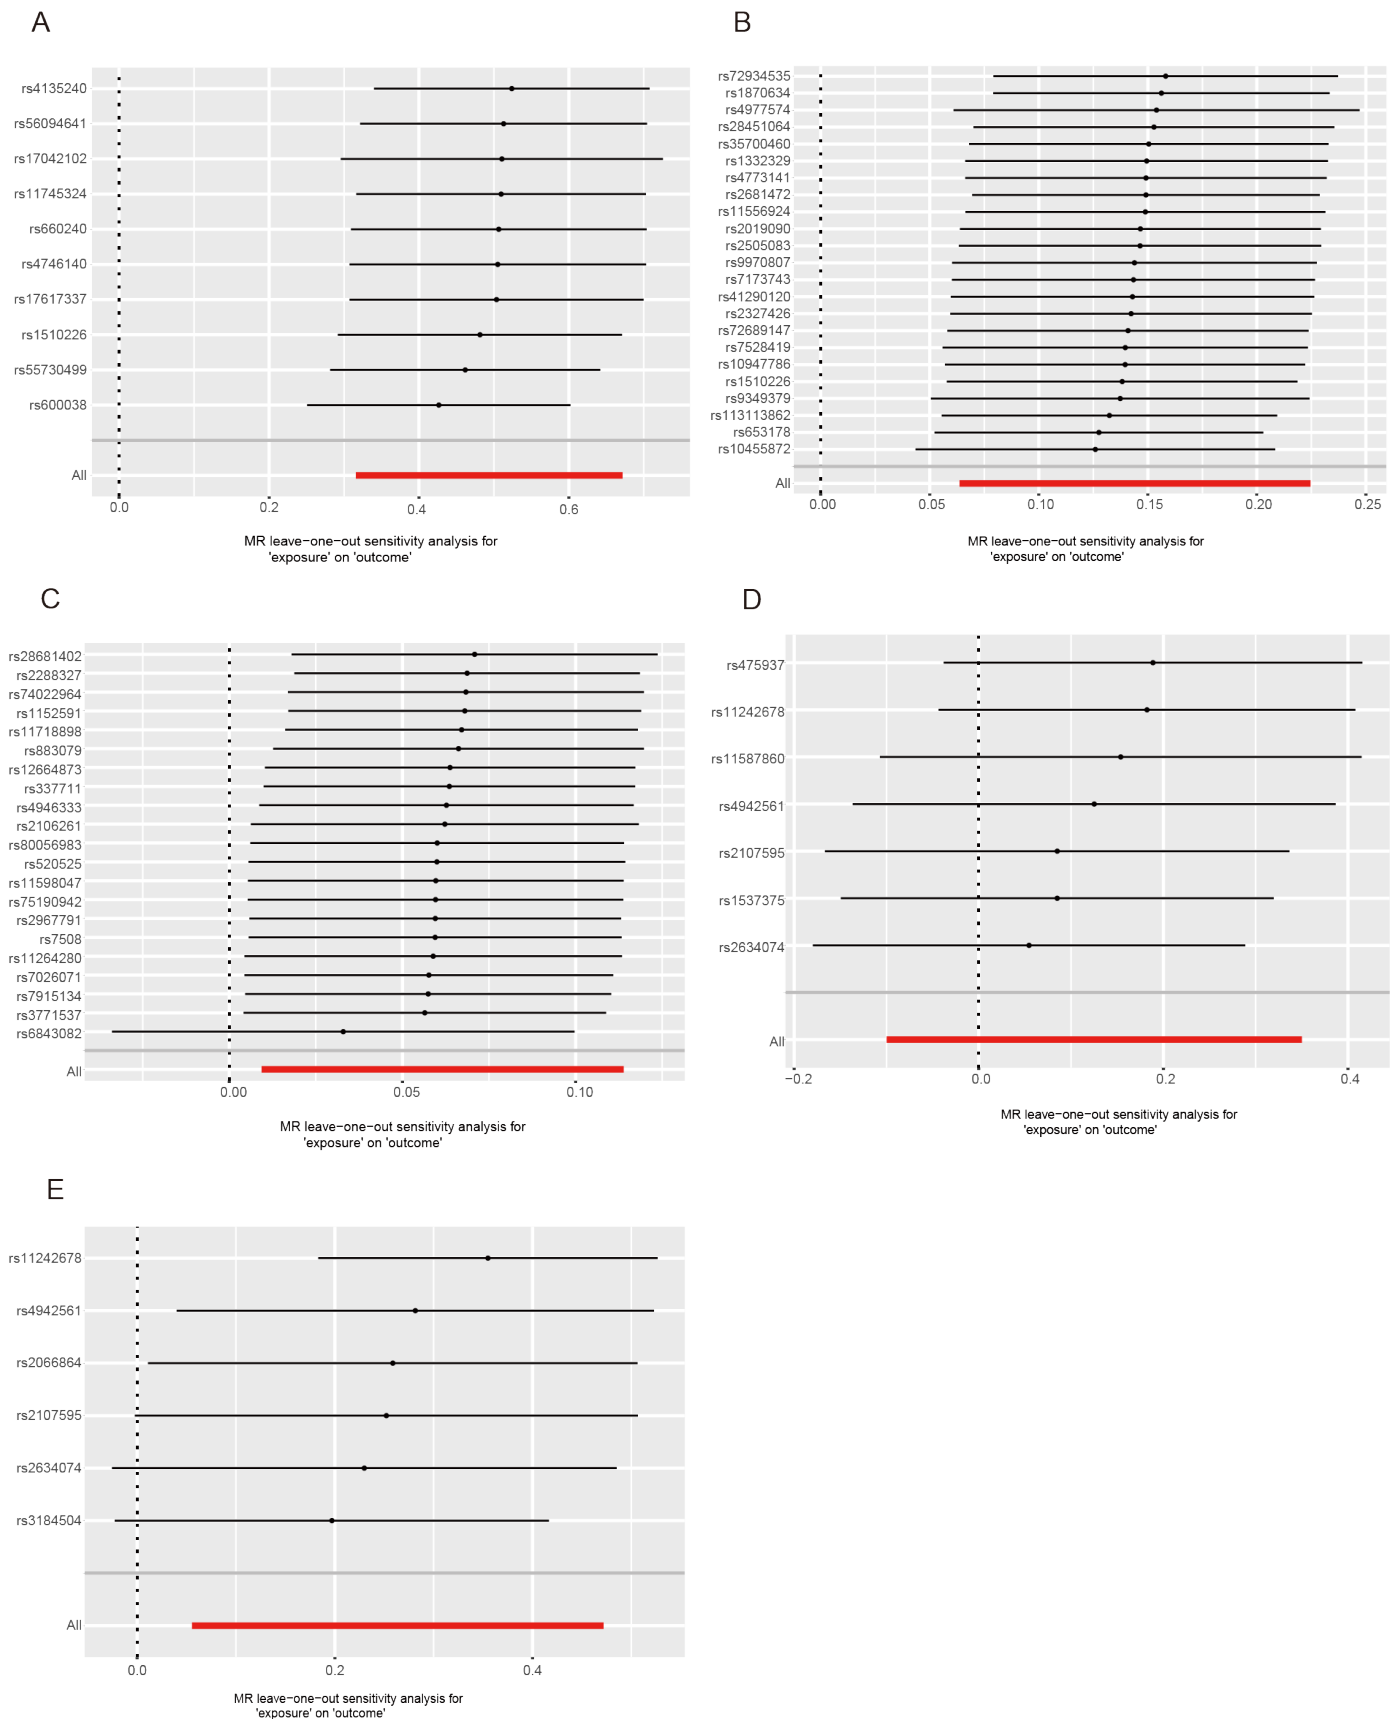

**Figure S4** Leave-one-out sensitivity analysis in the Mendelian randomization analysis of cardiovascular disease and anemia in FinnGen study. (A) Heart failure and Anemia; (B) Coronary artery disease and Anemia; (C) Atrial fibrillation and Anemia; (D) Any stroke and Anemia, “rs10774624” was removed as outliers in the MR-PRESSO analysis; AIS\*, any ischemic stroke; (E) Any ischemic stroke and Anemia, “rs2634074” and “rs4942561” was removed as outliers in the MR-PRESSO analysis.

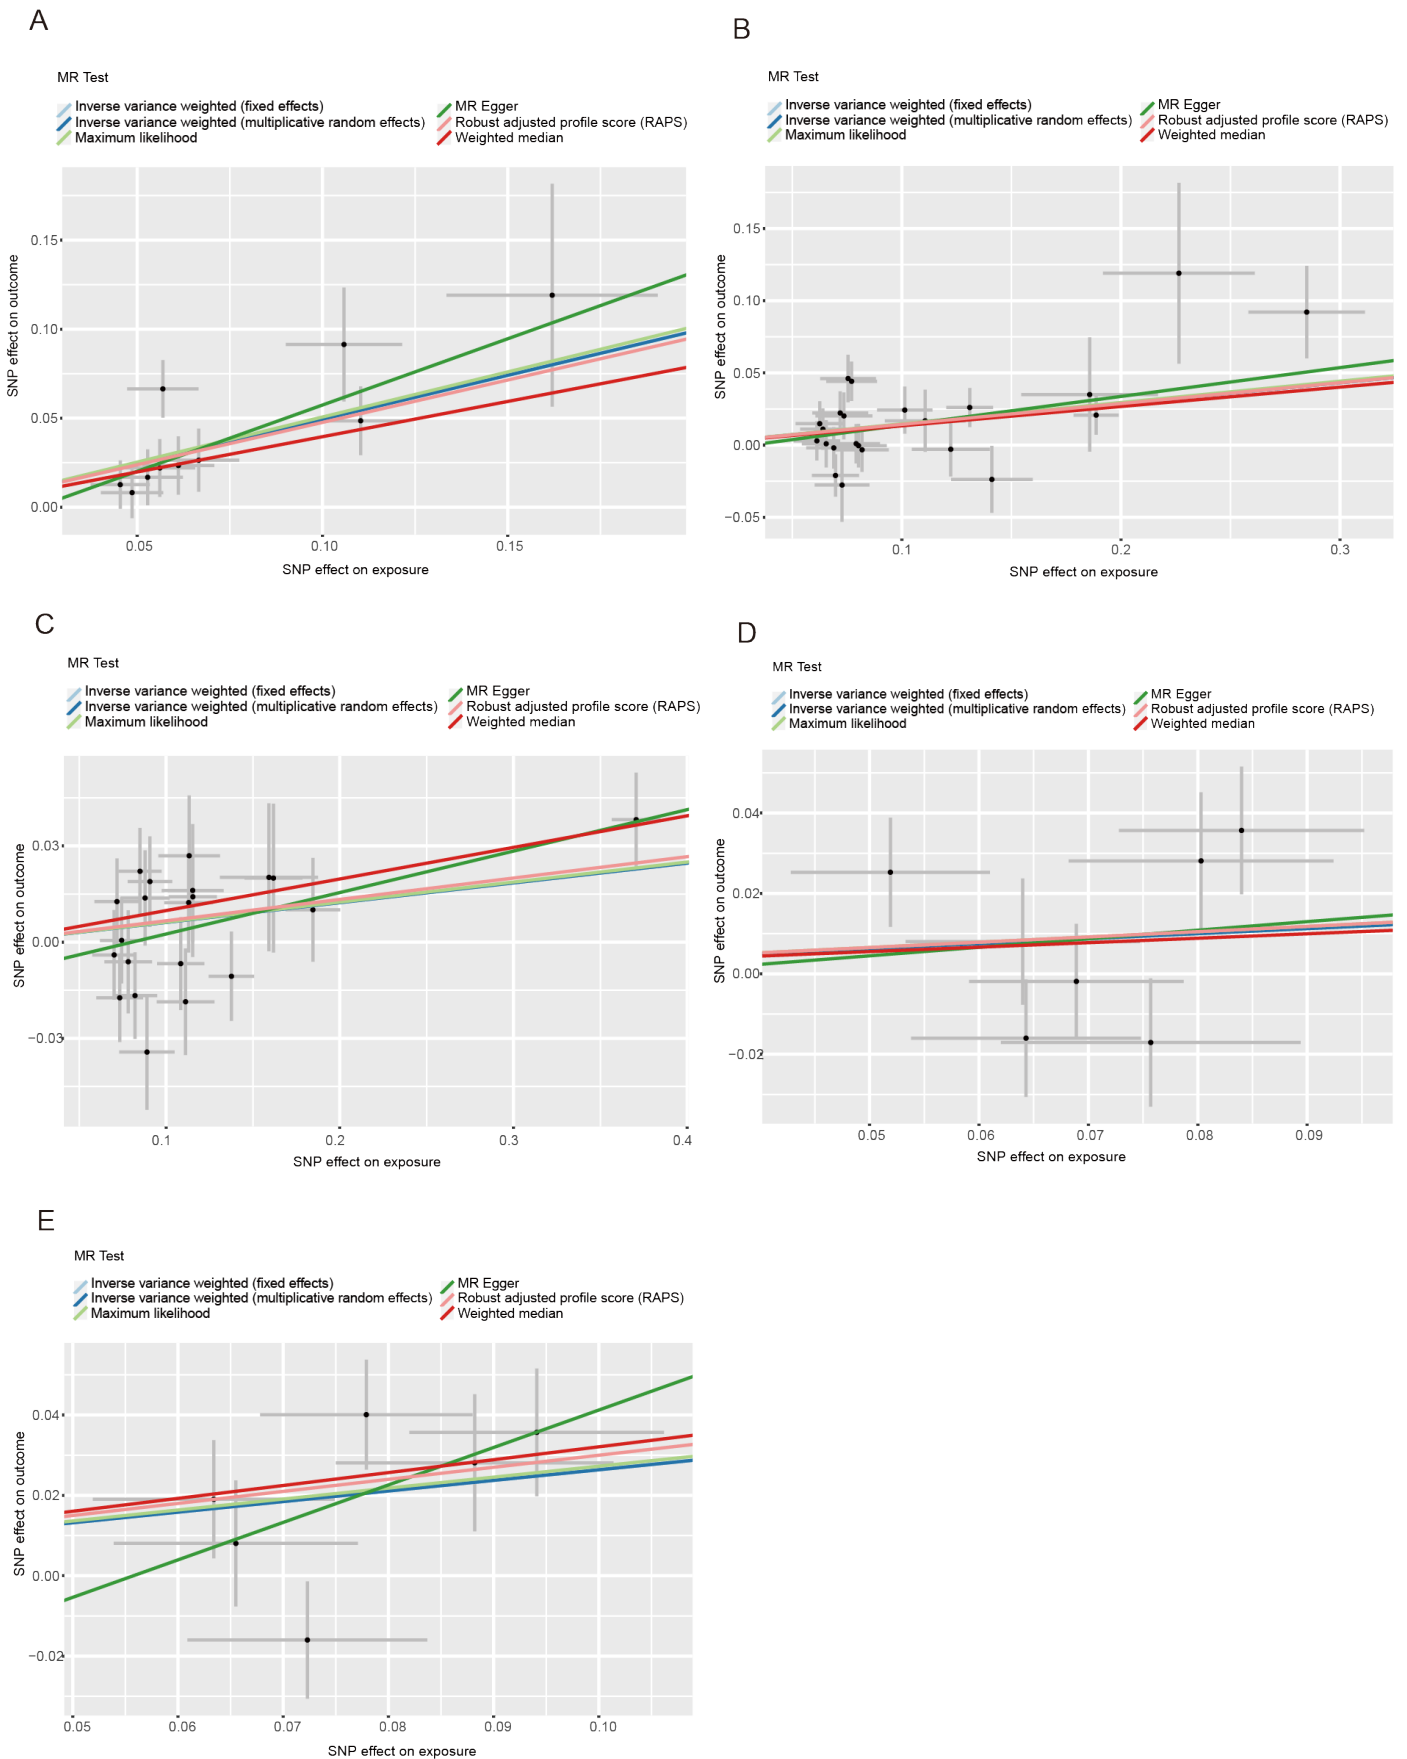

**Figure S5** Scatter\_plot in the Mendelian randomization analysis of cardiovascular disease and anemia in FinnGen study. (A) Heart failure and Anemia; (B) Coronary artery disease and Anemia; (C) Atrial fibrillation and Anemia; (D) Any stroke and Anemia, “rs10774624” was removed as outliers in the MR-PRESSO analysis; AIS\*, any ischemic stroke; (E) Any ischemic stroke and Anemia, “rs2634074” and “rs4942561” was removed as outliers in the MR-PRESSO analysis.

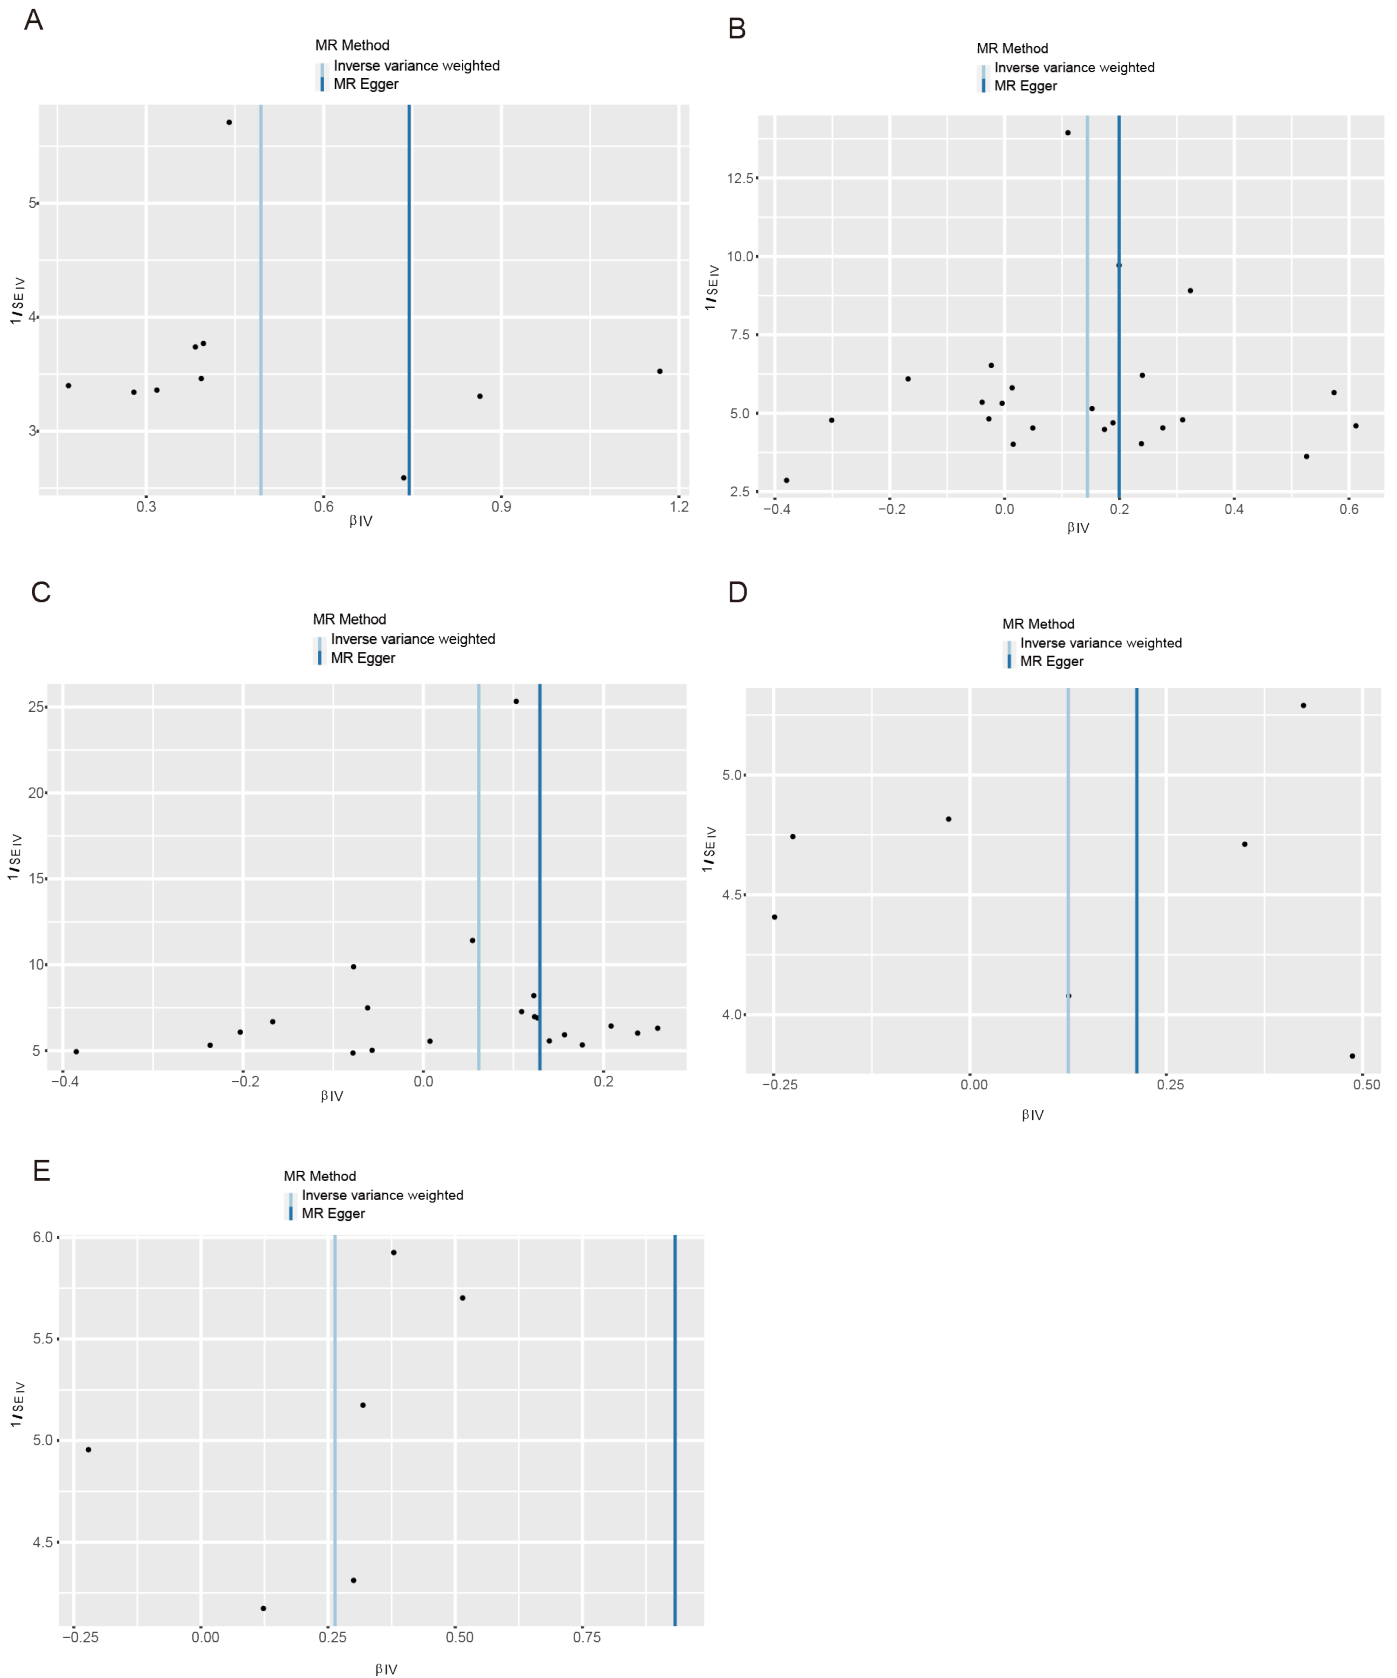

**Figure S6** Funnel\_plot in the Mendelian randomization analysis of cardiovascular disease and anemia in FinnGen study. (A) Heart failure and Anemia; (B) Coronary artery disease and Anemia; (C) Atrial fibrillation and Anemia; (D) Any stroke and Anemia, “rs10774624” was removed as outliers in the MR-PRESSO analysis; AIS\*, any ischemic stroke; (E) Any ischemic stroke and Anemia, “rs2634074” and “rs4942561” was removed as outliers in the MR-PRESSO analysis.
